# Supplementary material
Source: PubMed Central journal article supplement (PMC8338742)
Supplement: NIHMS1684779-supplement-7.pdf [file NIHMS1684779-supplement-7.pdf]

## **SUPPLEMENTAL INFORMATION**

### **CARM1 Inhibition Enables Immunotherapy of Resistant Tumors by Dual Action on Tumor and T-cells**

Sushil Kumar<sup>1,2\*</sup>, Zexian Zeng<sup>3\*</sup>, Archis Bagati<sup>1,2\*</sup>, Rong En Tay<sup>1,2\*</sup>, Lionel A. Sanz<sup>4</sup>, Stella R. Hartono<sup>4</sup>, Yoshinaga Ito<sup>1,2</sup>, Fieda Abderazzaq<sup>5,6</sup>, Elodie Hatchi<sup>5,6</sup>, Peng Jiang<sup>3,7</sup>, Adam N. R. Cartwright<sup>1,2</sup>, Olamide Olawoyin<sup>1,8</sup>, Nathan D. Mathewson<sup>1,2</sup>, Jason W. Pyrdol<sup>1,2</sup>, Mamie Z. Li<sup>9</sup>, John G. Doench<sup>10</sup>, Matthew A. Booker<sup>11</sup>, Michael Y. Tolstorukov<sup>11</sup>, Stephen J. Elledge<sup>9</sup>, Frédéric Chédin<sup>4</sup>, X. Shirley Liu<sup>3#</sup>, Kai W. Wucherpfennig<sup>1,2,12#</sup>

Figure S1

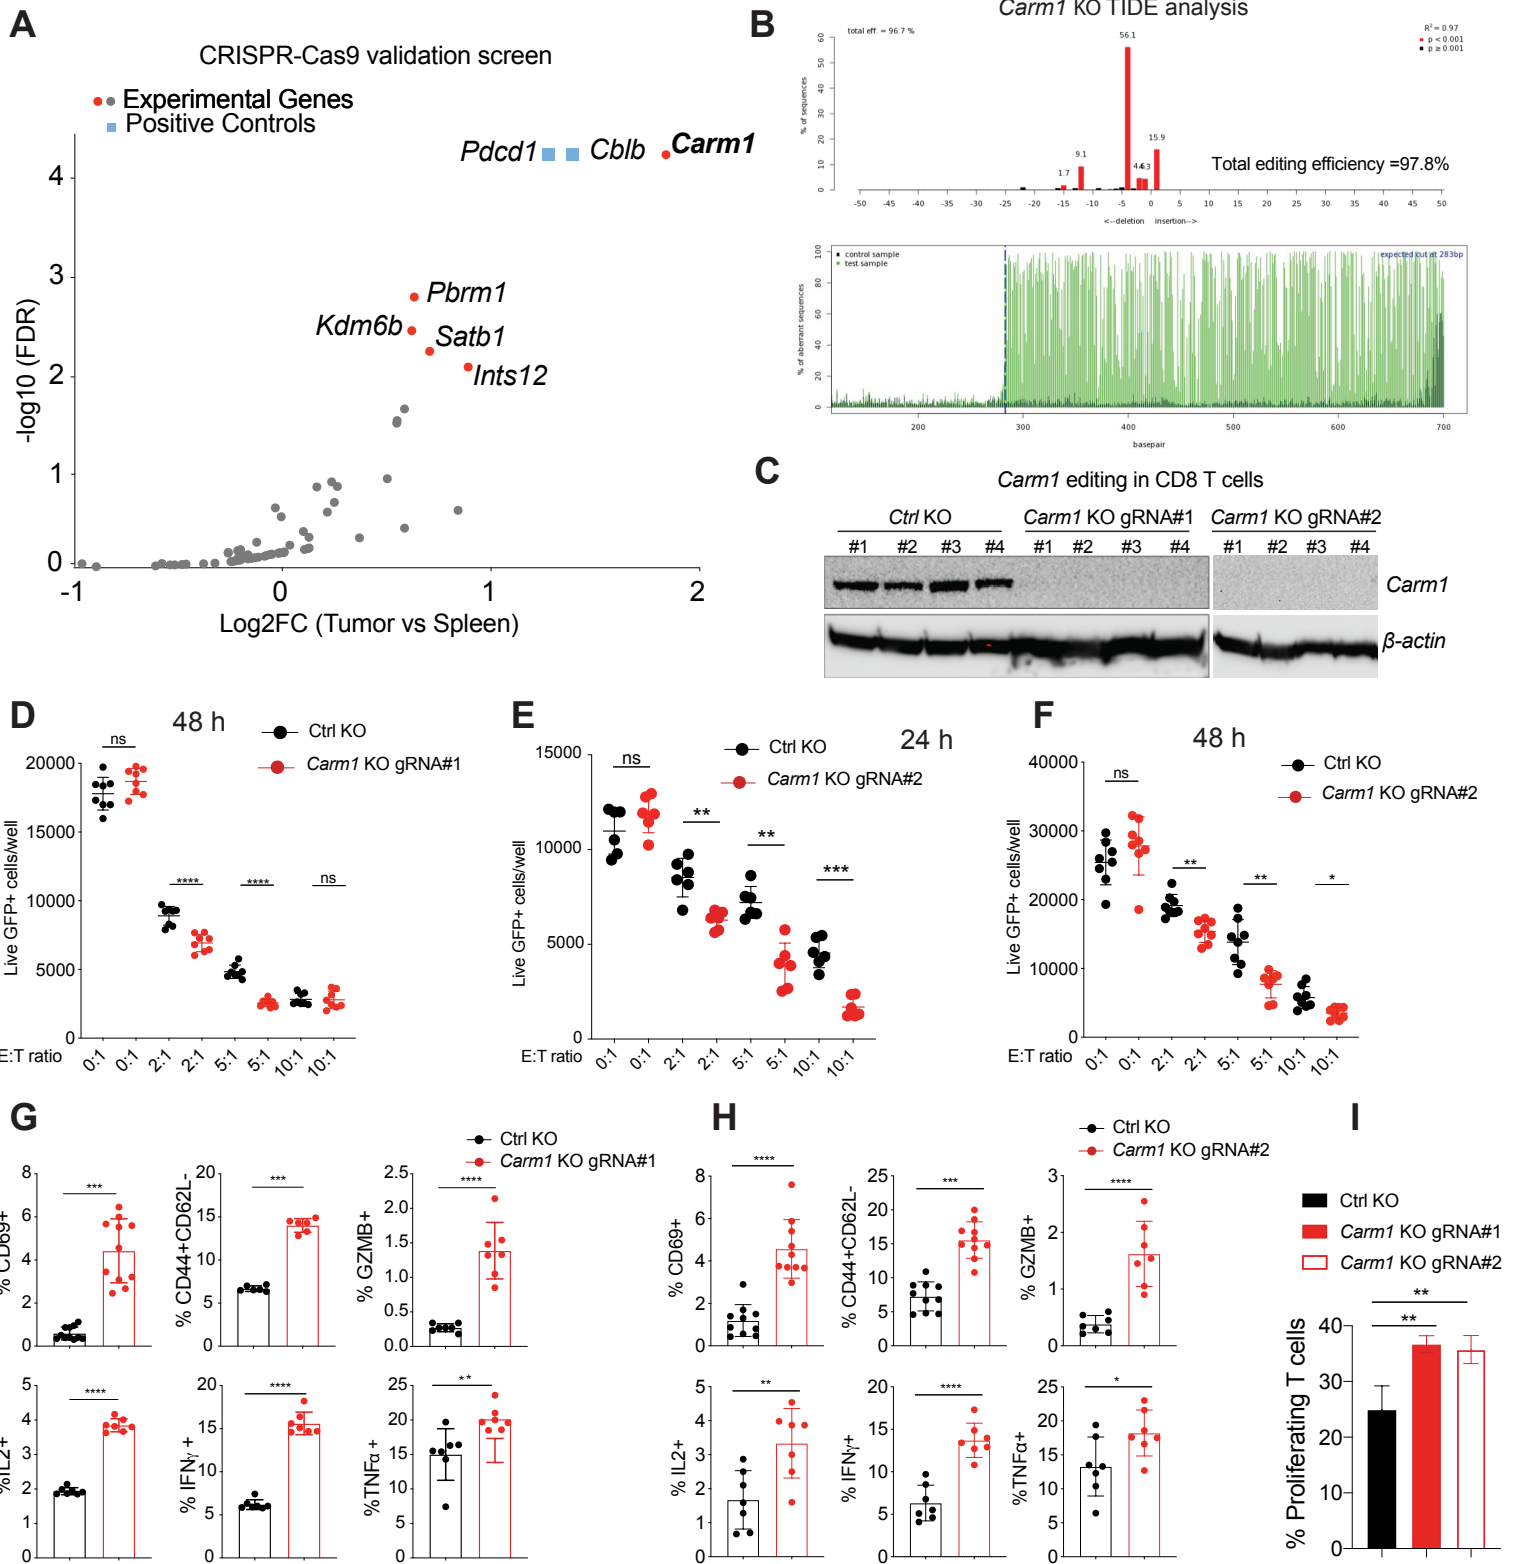

**Figure S1. Identification of CARM1 as a therapeutic target in tumor-infiltrating T cells and tumor cells. Related to Figure 1.**

- A.** Validation screen with focused epigenetic gRNA library. The library contained gRNAs for the top 31 genes from the primary screen and two positive control genes (*Pdcd1* and *Cblb*); 186 gRNAs were added as controls. OT-I T cells were transduced with the lentiviral gRNA library and injected into mice with subcutaneous B16F10-OVA tumors. On day 10 following T cell transfer, gRNA representation was quantified for T cells isolated from tumors (experimental organ) versus spleens (control organ). Graph shows log<sub>2</sub> fold difference in gRNA representation in tumors versus spleens (X-axis) and statistical significance for indicated genes (Y-axis).
- B.** Validation of *Carm1* KO in CD8 T cells by CRISPR. TIDE analysis (Tracking of Indels by Decomposition) of genomic DNA sequenced from KO cells showing 97.8% editing efficiency.
- C.** Western blot analysis of *Carm1* protein in OT-I CD8 T cells edited with control or *Carm1* gRNAs (2 different *Carm1* gRNAs, 4 technical replicates in each group). CD8 T cells were electroporated with RNPs composed of Cas9 protein with bound gRNAs; *Carm1* protein levels were analyzed on day 7 following electroporation.
- D.** T cell cytotoxicity assay with *Carm1*-KO (*Carm1* gRNA#1) and control-KO OT-I CD8 T cells. T cells were co-cultured with B16F10-OVA-ZsGreen tumor cells at indicated effector to target (E: T) ratios (n=7-10/replicates per condition); 48 hours later live GFP-positive tumor cells were counted using a Celigo image cytometer. Data are representative of three experiments and shown as mean ± SEM. \*\*\*\*p < 0.0001, by unpaired two-sided Mann-Whitney test.
- E-F.** T cell cytotoxicity assay with *Carm1*-KO (*Carm1* gRNA#2) and control-KO OT-I CD8 T cells. 24 (**E**) and 48 (**F**) hours later live GFP-positive tumor cells were counted using a Celigo image cytometer.
- G-H.** Flow cytometry analysis of *Carm1*-KO CD8 T cells generated using gRNA#1 (**G**), gRNA#2

(H) and control-KO OT-I CD8 T cells following co-culture with tumor cells. Edited T cells were co-cultured with B16-OVA-ZsGreen tumor cells at a 1:2 ratio for 24 hours followed by flow cytometric analysis of indicated markers. Data are representative of two experiments and shown as mean  $\pm$  SEM, \*\*  $p < 0.01$ , \*\*\* $p < 0.001$ , \*\*\*\* $p < 0.0001$  by unpaired two-sided Mann-Whitney test.

- I. Assay to examine antigen-dependent proliferation of control-KO or *Carm1*-KO CD8 T cells. OT-I CD8 T cells were edited with control or *Carm1* gRNAs (gRNA#1 or #2) and cultured for 5 days in the presence of IL-15 and IL-7. T cells were then co-cultured for 4 days with B16-OVA-ZsGreen cells at a 5:1 (E:T) ratio, and CTV dilution was assessed by flow cytometry. Data were summarized as mean  $\pm$  S.E.M. and analyzed by unpaired two-sided Mann-Whitney test. \*\* $p < 0.01$ , \*\*\*\* $p < 0.0001$ .

Figure S2

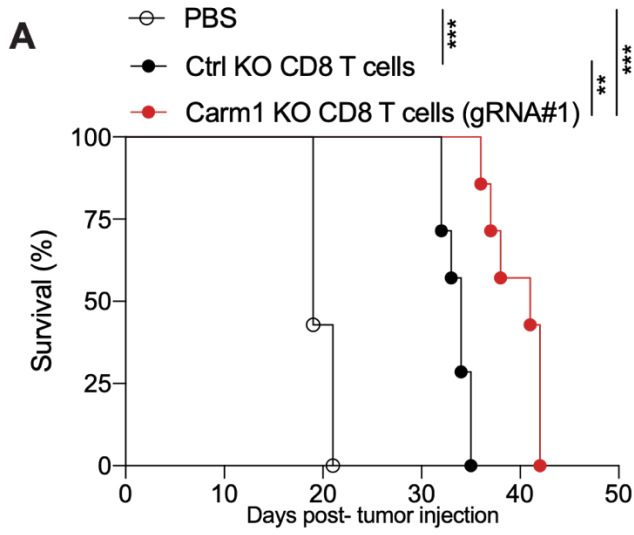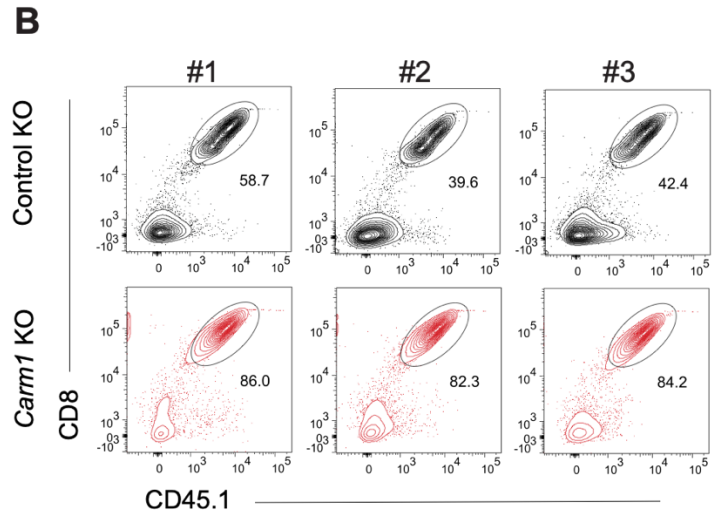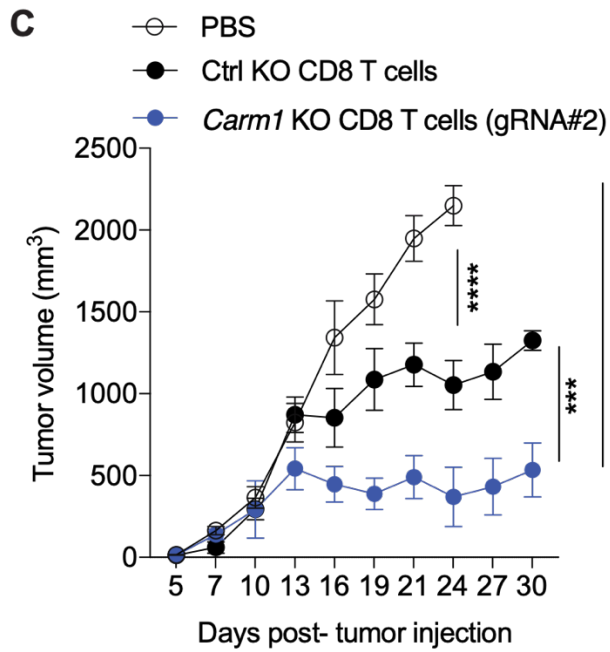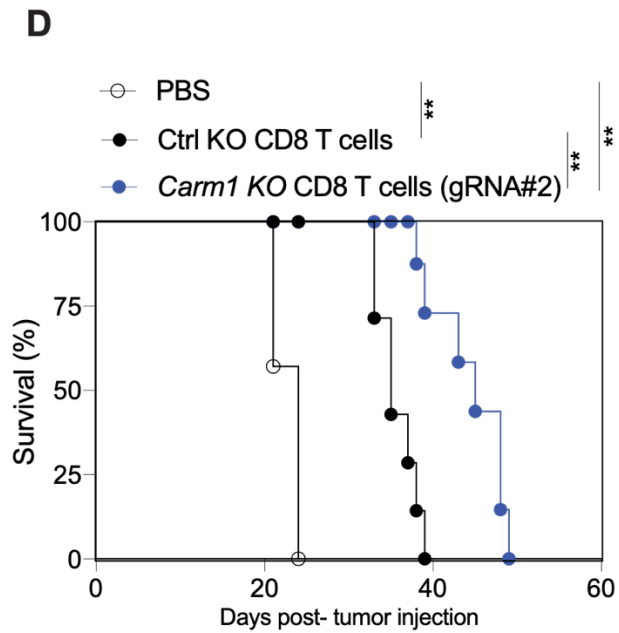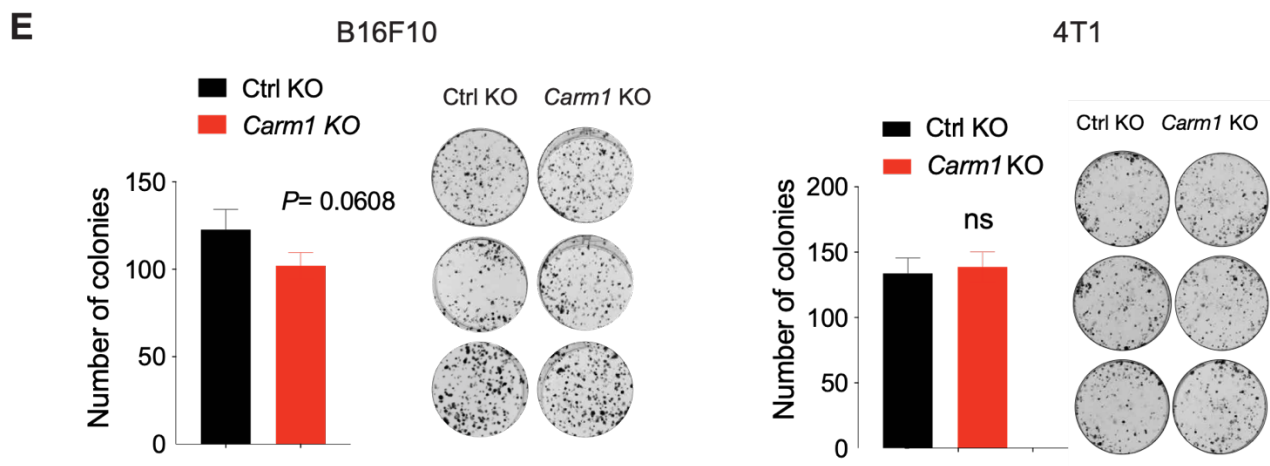

**Figure S2. Inactivation of *Carm1* in CD8 T cells enhances their anti-tumor function. Related to Figure 1.**

- A.** Survival of mice with B16F10-Ova melanomas following adoptive transfer of *Carm1*-KO (generated using gRNA#1) or control-KO OT-I CD45.1 CD8 T cells.
- B.** Representative flow plots of tumor infiltrating CD45.1 CD8 T cells following adoptive transfer of *Carm1*-KO or control-KO OT-I CD45.1 CD8 T cells. Gated on Live/singlets/CD45+ cells.
- C.** Anti-tumor activity of adoptively transferred *Carm1*-KO (generated using gRNA#2) or control-KO OT-I CD45.1 CD8 T cells. B16-OVA-ZsGreen tumor cells ( $0.1 \times 10^6$ ) were implanted subcutaneously. On day 7 following tumor cell inoculation, edited CD8 T cells ( $1 \times 10^6$ ) were transferred via tail vein injection. Tumor size was recorded; n=8-10 mice per group.
- D.** Survival of mice with B16F10-Ova melanomas following adoptive transfer of *Carm1*-KO (generated using gRNA#2) or control-KO OT-I CD45.1 CD8 T cells.
- E.** Growth of *Carm1*-KO and control-KO B16F10 melanoma cells (left) and 4T1 breast cancer cells (right) in a colony formation assay (500 input cells/well, 6-well plates for 5 days). Quantification of number of colonies in each group and representative images of plates of colonies are shown for each condition. Data are representative of two independent experiments.

Figure S3

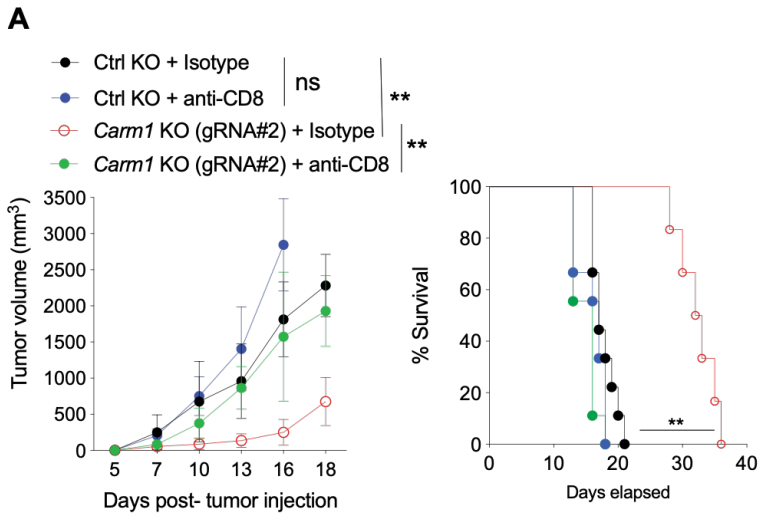

**B** ISGs associated with immunotherapy response

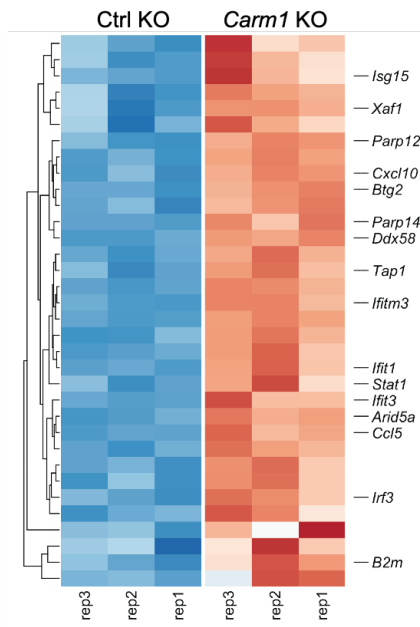

**C** p53 pathway genes

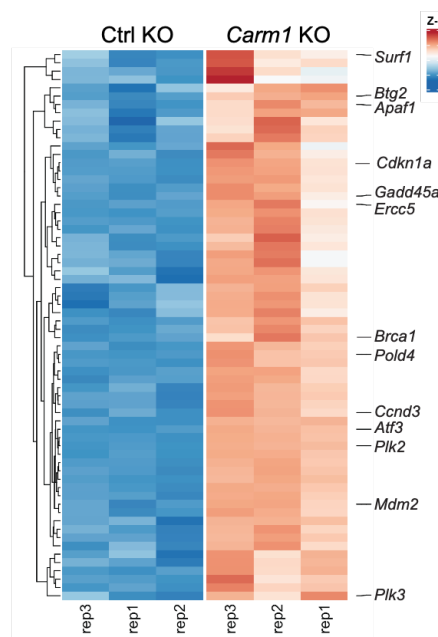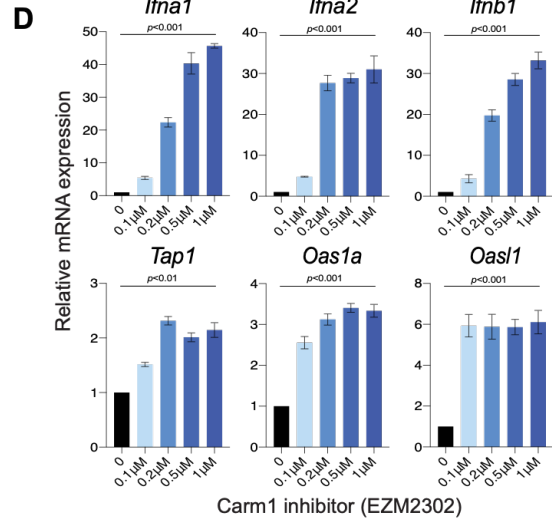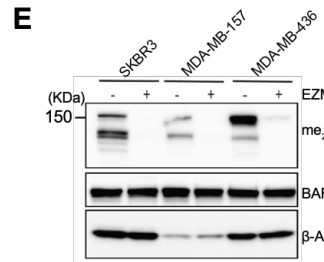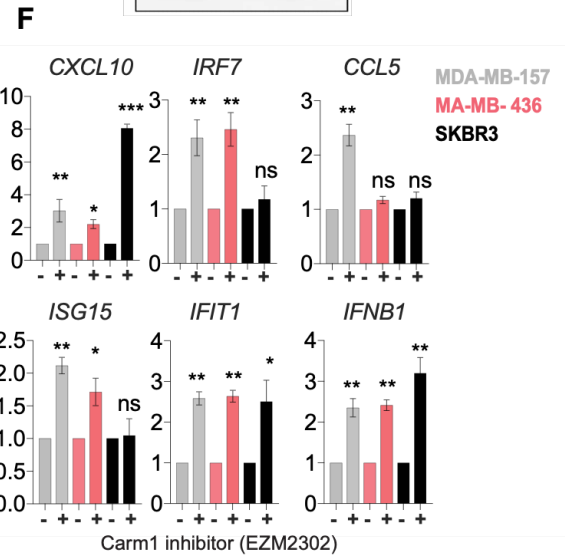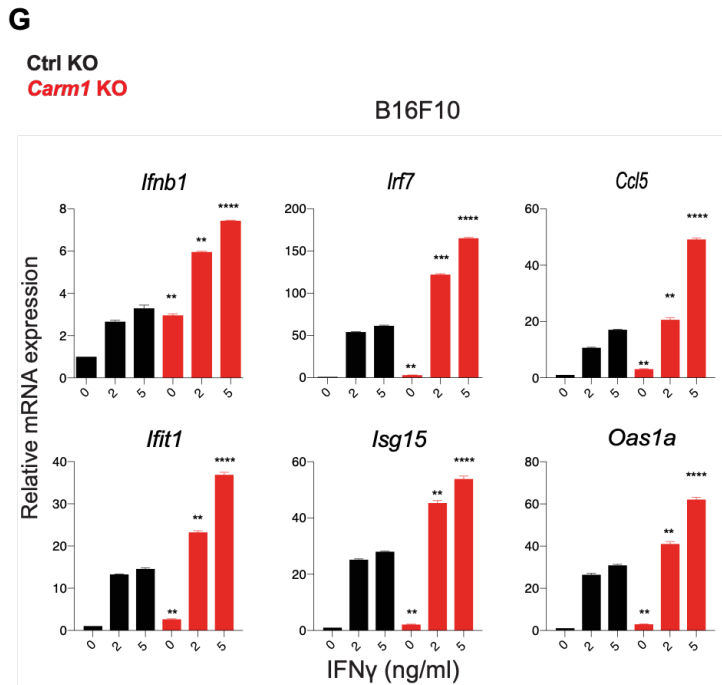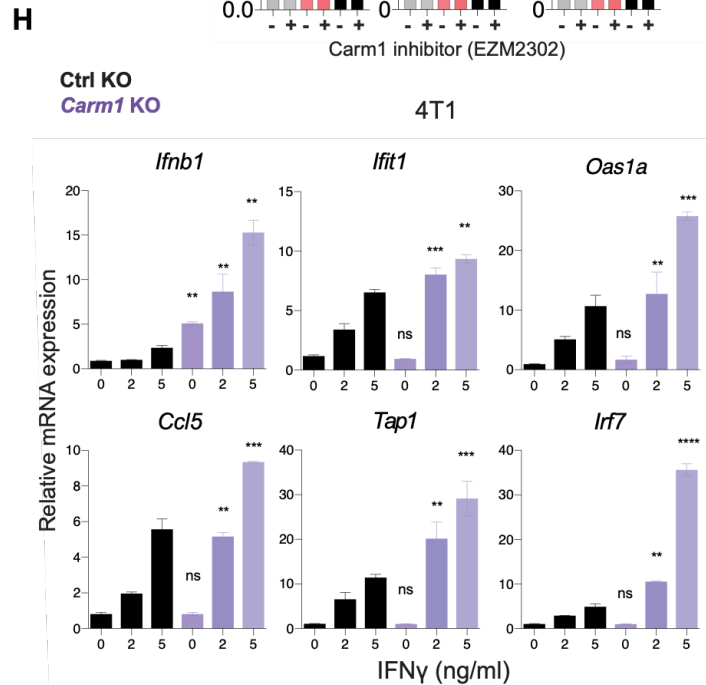

**Figure S3. Targeting of *Carm1* induces a type I interferon response in human and murine tumor cells. Related to Figures 3 and 4.**

- A.** Growth of *Carm1*-KO (*Carm1* gRNA#2) and control-KO B16F10 tumors (left) and survival of tumor bearing mice (right). Mice (n=8-10/group) were treated with CD8 depleting or isotype control antibodies.
- B.** Heatmap of differentially expressed ISGs in *Carm1*-KO and control-KO B16F10 tumor cells (n=3/group) that were previously found to be associated with immunotherapy response in human melanoma (Benci et al., 2019). Data are representative of two independent experiments.
- C.** Heatmap of differentially expressed p53 pathway genes in *Carm1*-KO versus control-KO B16F10 tumor cells (n=3/group). Data are representative of two independent experiments.
- D.** RT-qPCR analysis of indicated ISGs in B16F10 cells treated with CARM1 inhibitor EZM2302 (0 – 1  $\mu$ M) for 7 days (n=3/group).
- E.** Western blot analysis to validate activity of CARM1 inhibitor (EZM2302) in human tumor cells. BAF155 is a well-validated target of CARM1. SKBR3, MDA-MB-157 and MDA-MB-436 cells were treated with EZM2302 (0.1  $\mu$ M) or solvent control for 24 hours. Western blots were probed with Abs specific for di-methylated BAF155 protein (me2BAF155), total BAF155 protein and  $\beta$ -actin (loading control).
- F.** Analysis of ISGs in human tumor cells treated with CARM1 inhibitor (EZM2302). RT-qPCR analysis of selected ISGs and IFNs in human SKBR3, MDA-MB-157 and MDA-MB-436 cells treated with vehicle or CARM1 inhibitor (2  $\mu$ M) for 7 days (n=3/group).
- G.** Responsiveness of *Carm1*-KO compared to control-KO B16F10 cells to IFN $\gamma$  treatment. Cells were treated overnight with IFN $\gamma$  (0, 2 or 5 ng/ml), and mRNA levels of ISGs were analyzed by RT-qPCR (n=3/group).



**H.** Responsiveness of *Carm1*-KO compared to control-KO 4T1 cells to IFN $\gamma$  treatment. Cells were treated overnight with IFN $\gamma$  (0, 2 or 5 ng/ml), and mRNA levels of ISGs were analyzed by RT-qPCR (n=3/group).

Figure S4

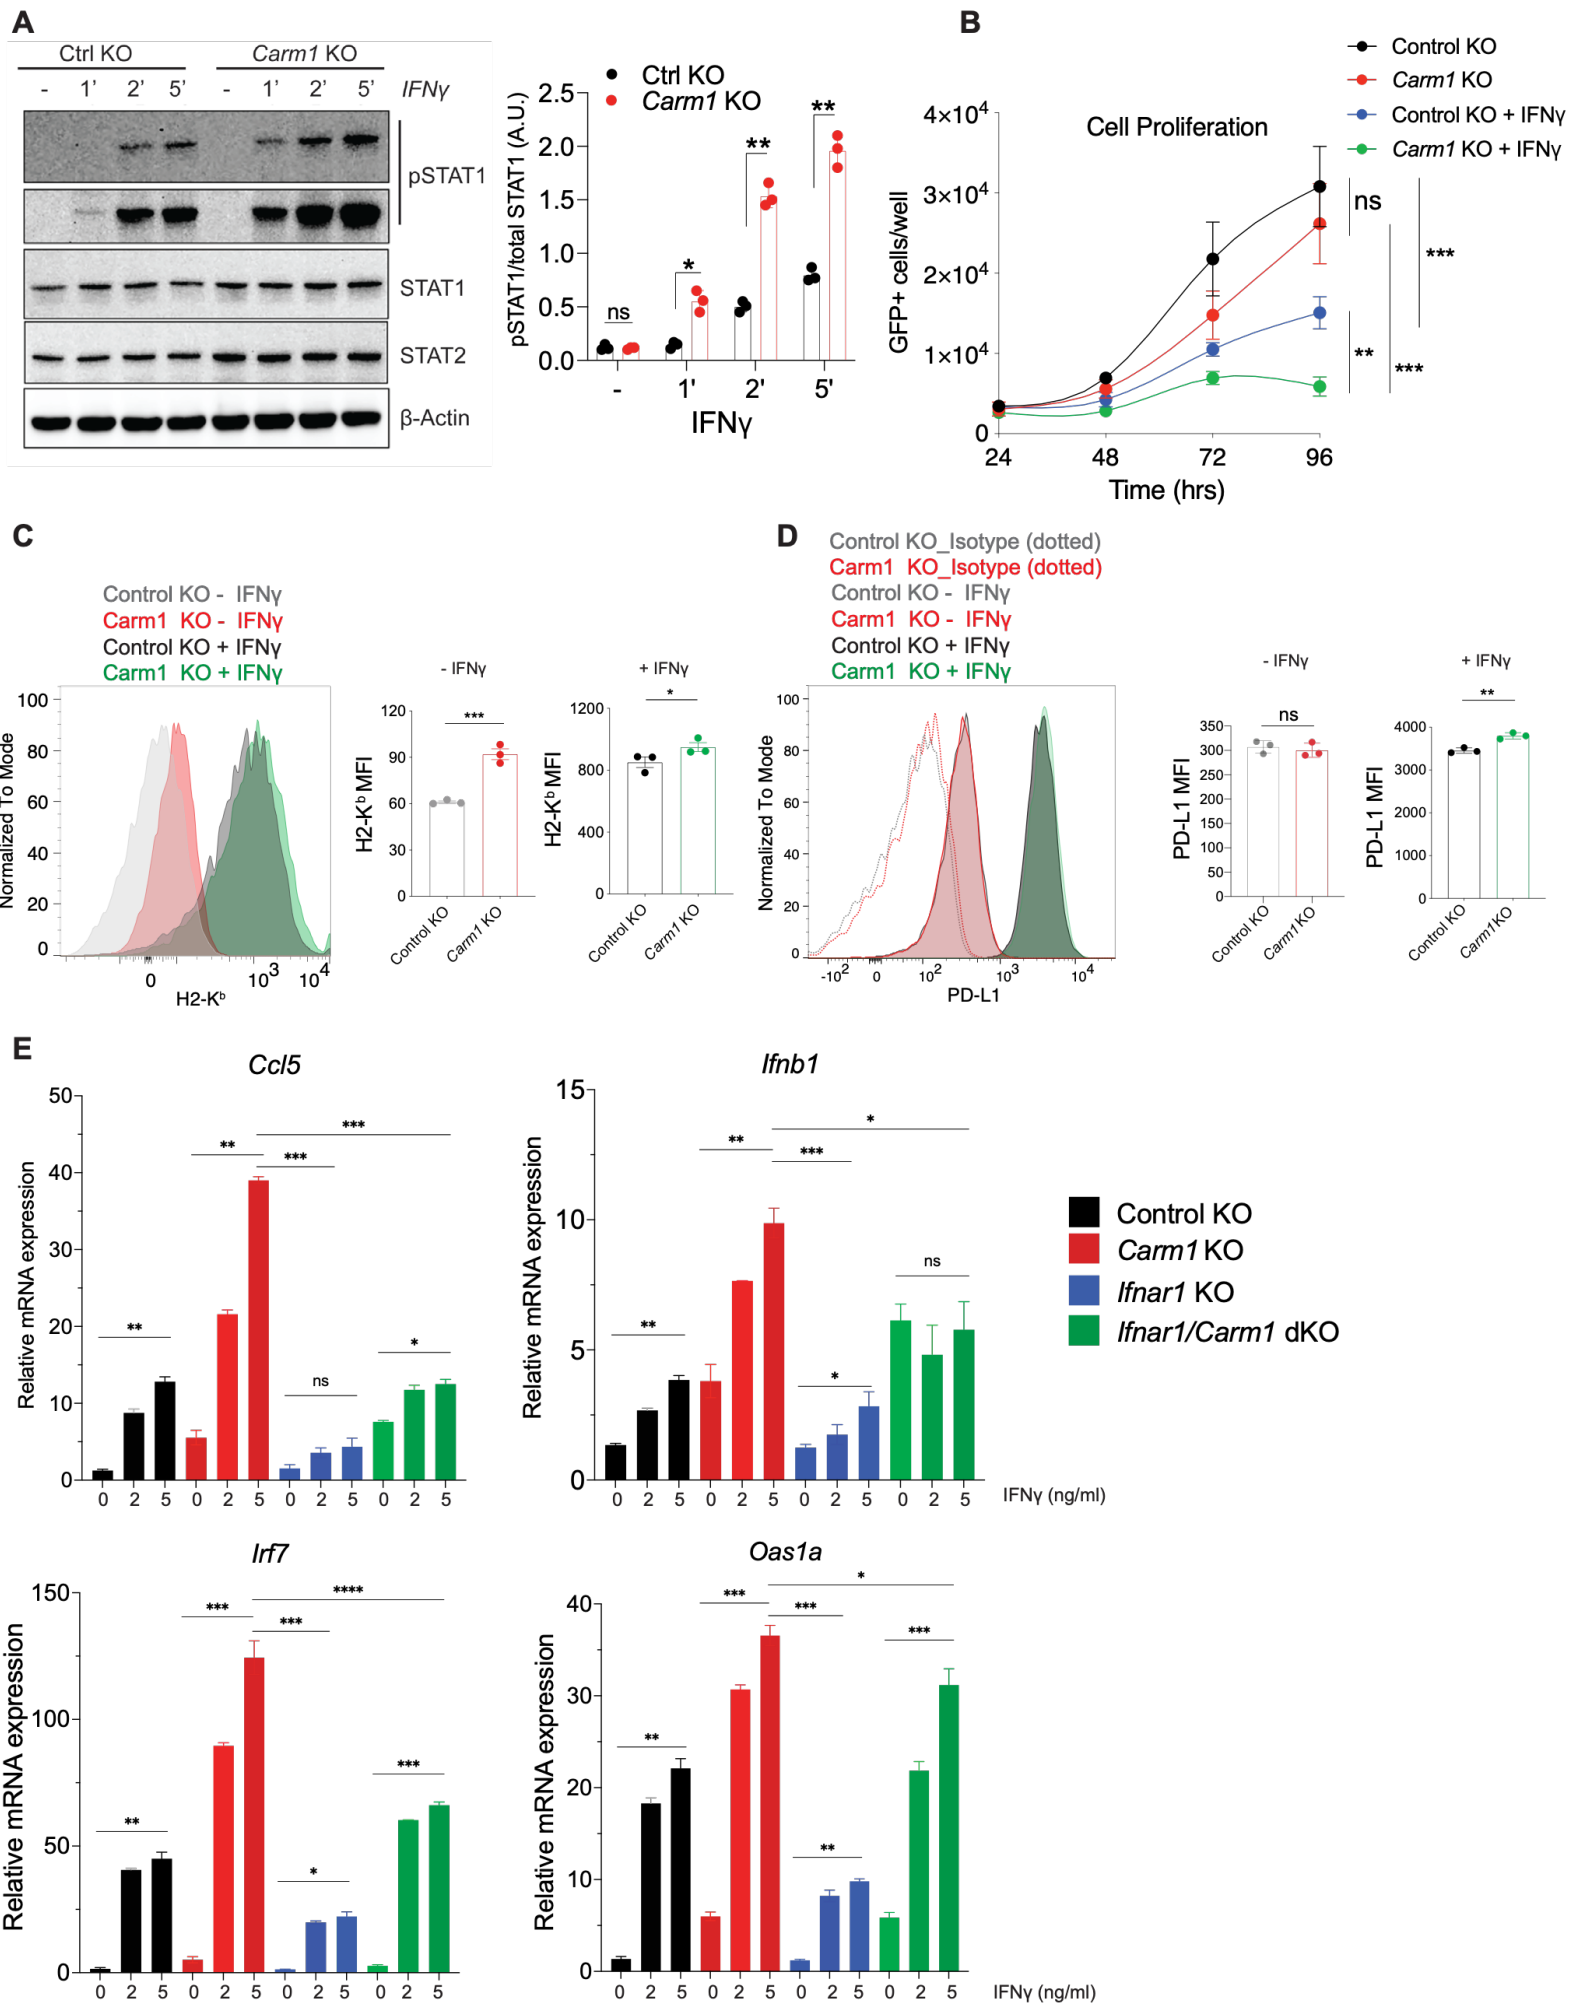

**Figure S4. Targeting of *Carm1* enhances sensitivity of tumor cells to IFN $\gamma$ . Related to Figure 4.**

- A.** Analysis of IFN $\gamma$  signaling in *Carm1*-KO and control-KO B16F10 cells. B16F10 cells were stimulated with IFN $\gamma$  for 0-5 minutes, and levels of phosphorylated STAT1 (pSTAT1) as well as total STAT1, STAT2 and  $\beta$ -actin were analyzed by Western blotting. Long (5min) and short (1min) exposures of same blot are shown for pSTAT1 (left). Quantification of pSTAT1 blots using ImageJ from three separate experiments shown on right.
- B.** Analysis of cell proliferation of *Carm1*-KO and control-KO B16F10 cells in the presence of IFN $\gamma$ . Equal numbers of GFP+ B16F10 cells were cultured in complete media supplemented with IFN $\gamma$  for 4 days, and GFP+ live cells were counted each day using a Celigo image cytometer (n=4/group).
- C.** Analysis of H2-K<sup>b</sup> expression +/- IFN $\gamma$  treatment of *Carm1*-KO and control-KO B16F10 cells.
- D.** Analysis of PD-L1 expression +/- IFN $\gamma$  treatment of *Carm1*-KO and control-KO B16F10 cells.
- E.** RT-qPCR analysis of indicated ISGs following stimulation with the indicated concentrations of IFN $\gamma$  in control-KO, *Carm1*-KO, *Ifnar1*-KO and *Ifnar1/Carm1* dKO B16F10 cells (n=3/group).

Figure S5

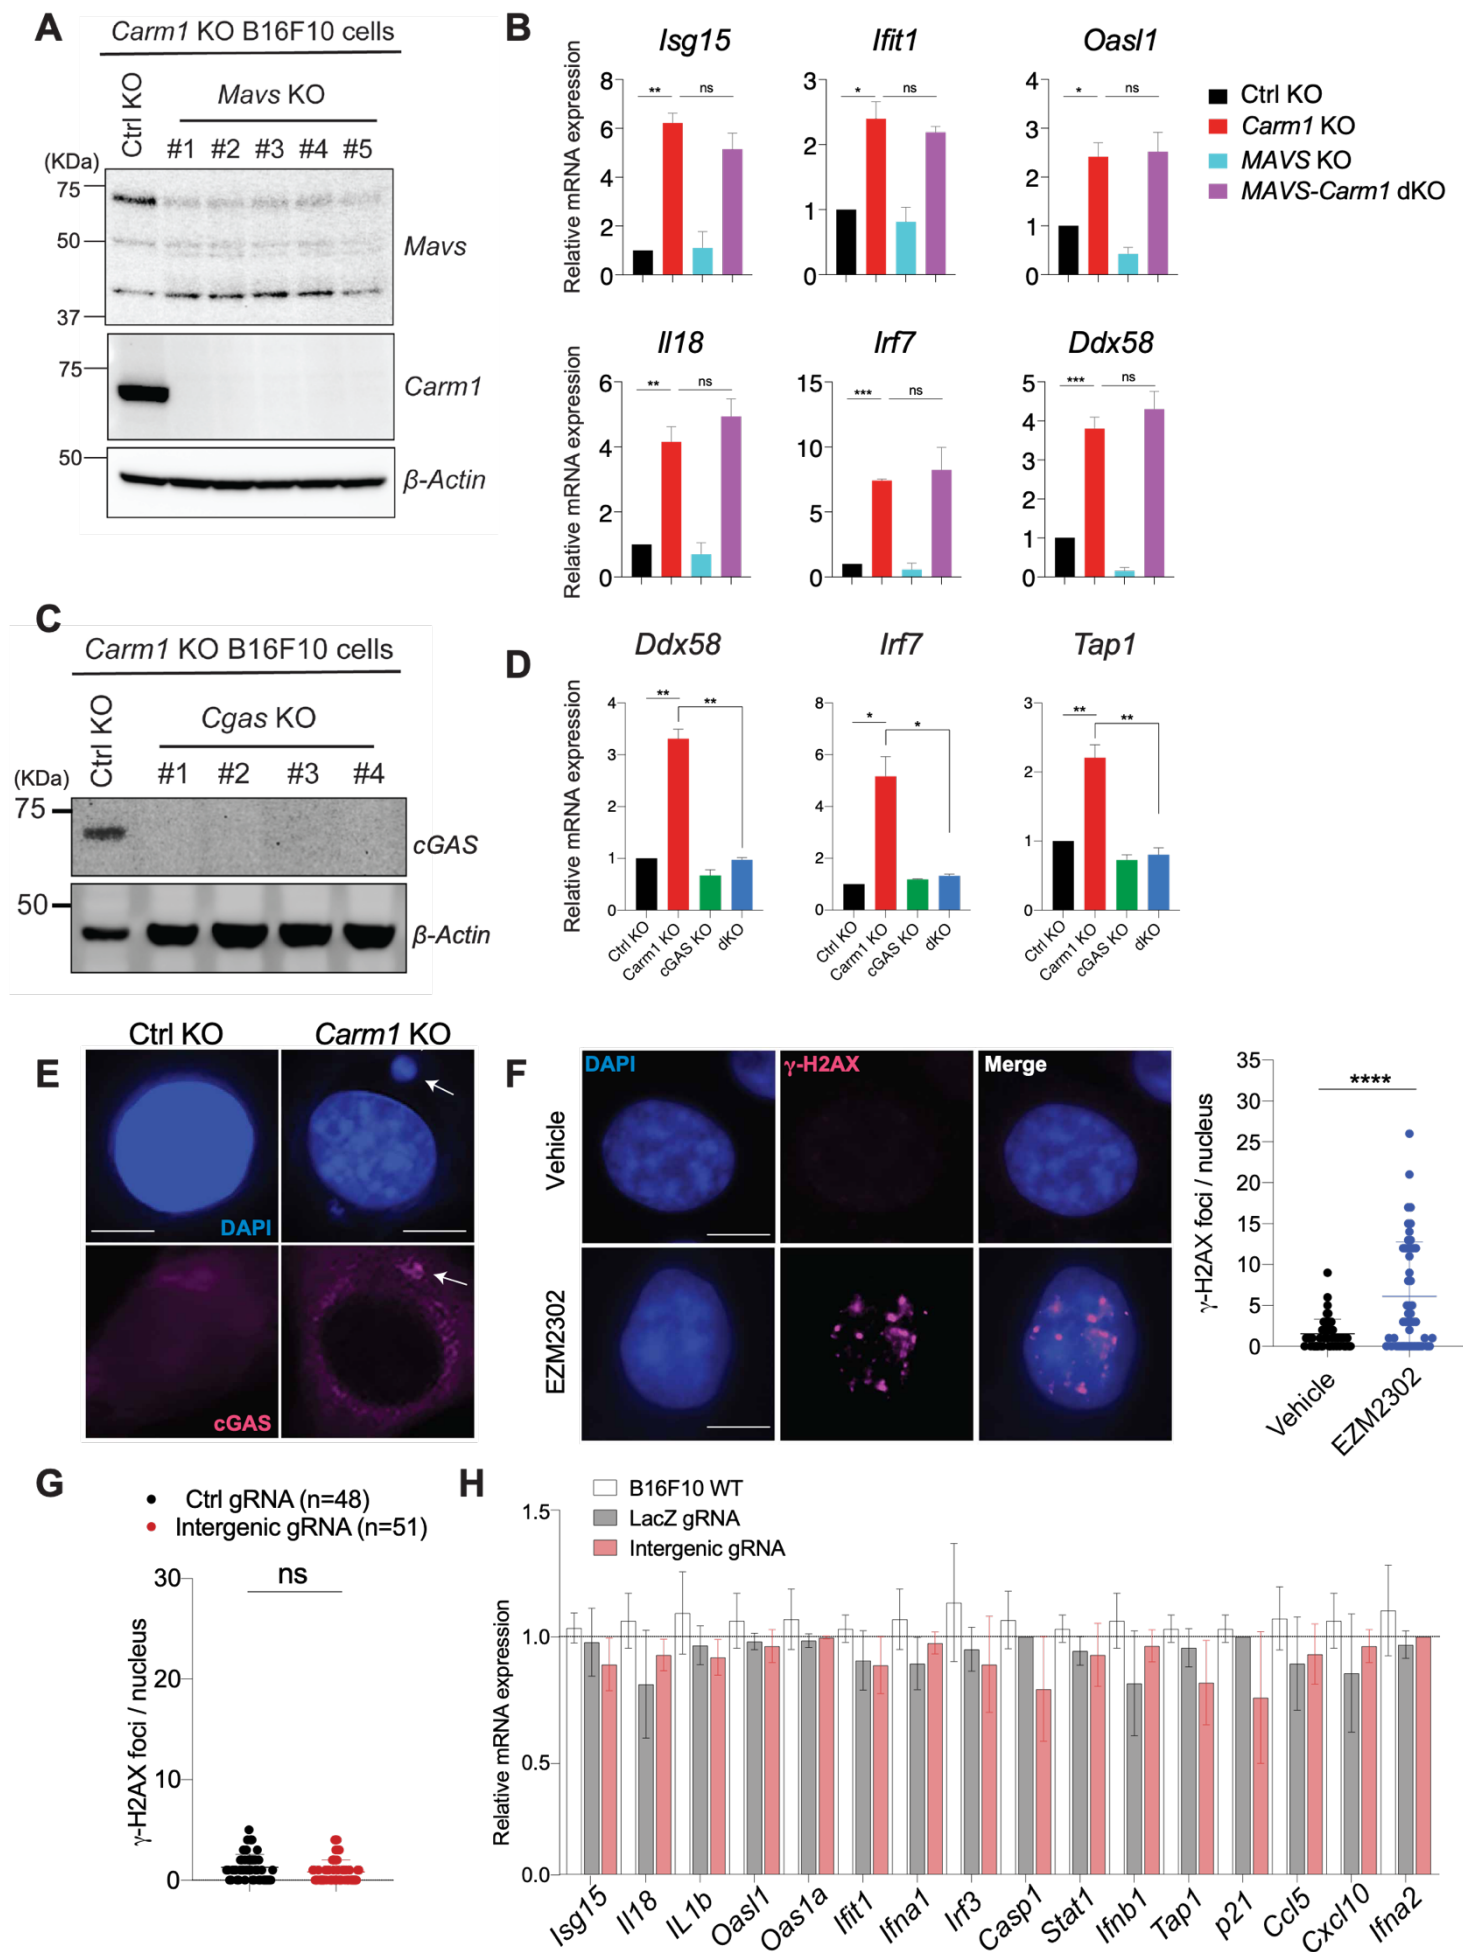

**Figure S5. Inactivation of *Carm1* induces a cGAS-mediated type I interferon response in human and murine tumor cells. Related to Figure 4.**

- A.** Mavs protein levels in *Carm1*-KO B16F10 cells edited with *Mavs* or control gRNAs. Replicates of different lines edited with the same gRNA are shown.  $\beta$ -actin is shown as a loading control.
- B.** RT-qPCR analysis of selected ISGs and IFNs in control, *Carm1*-KO, *Mavs*-KO and *Carm1/Mavs* dKO B16F10 cells (n=3/group).
- C.** cGas protein levels in *Carm1*-KO B16F10 cells edited with *Cgas* or control gRNAs. Replicates of different lines edited with the same *Cgas* gRNA or a control gRNA are shown.  $\beta$ -actin is shown as a loading control.
- D.** RT-qPCR analysis of selected ISGs in control, *Carm1*-KO, *Cgas*-KO and *Carm1/Cgas* dKO B16F10 cells (n=3/group).
- E.** Analysis of micronuclei in *Carm1*-KO and control-KO B16F10 cells. Tumor cells were transduced with a HA epitope tagged *Cgas* cDNA; ZsGreen was expressed downstream of an IRES by the same lentiviral vector. Representative immunofluorescence for HA epitope tagged cGAS (purple) and DAPI (blue); DAPI labeling was used to identify nuclei and micronuclei. Scale bar – 10 $\mu$ M.
- F.** dsDNA damage in CARM1 inhibitor (EZM2302) versus vehicle (5% Dextrose) treated B16F10 tumor cells based on labeling with  $\gamma$ H2AX antibody. Representative immunofluorescence images (left) of  $\gamma$ H2AX antibody labeling (purple); nuclei labeled with DAPI. Quantification of number of  $\gamma$ H2AX foci/nucleus (right). Data are shown as mean  $\pm$  SEM, \*\*\*p < 0.001, by unpaired two-sided Mann-Whitney test. Scale bar – 10 $\mu$ M.
- G.** Quantification of the percentage of B16F10 tumor cells with  $\gamma$ H2AX foci following editing with two different control gRNAs (LacZ control gRNA, intergenic gRNA).
- H.** RT-qPCR analysis of ISGs in B16F10 cells without editing (WT) and following editing with two different control gRNAs (LacZ, intergenic). ISG levels were analyzed >7 days following editing.

Data shown in B, D, F and G are summarized as mean  $\pm$  S.D. and were analyzed by unpaired two-sided Mann-Whitney test. Data are representative of three experiments, \*p < 0.05, \*\*p < 0.01, \*\*\*p < 0.001, ns (non-significant).

Figure S6

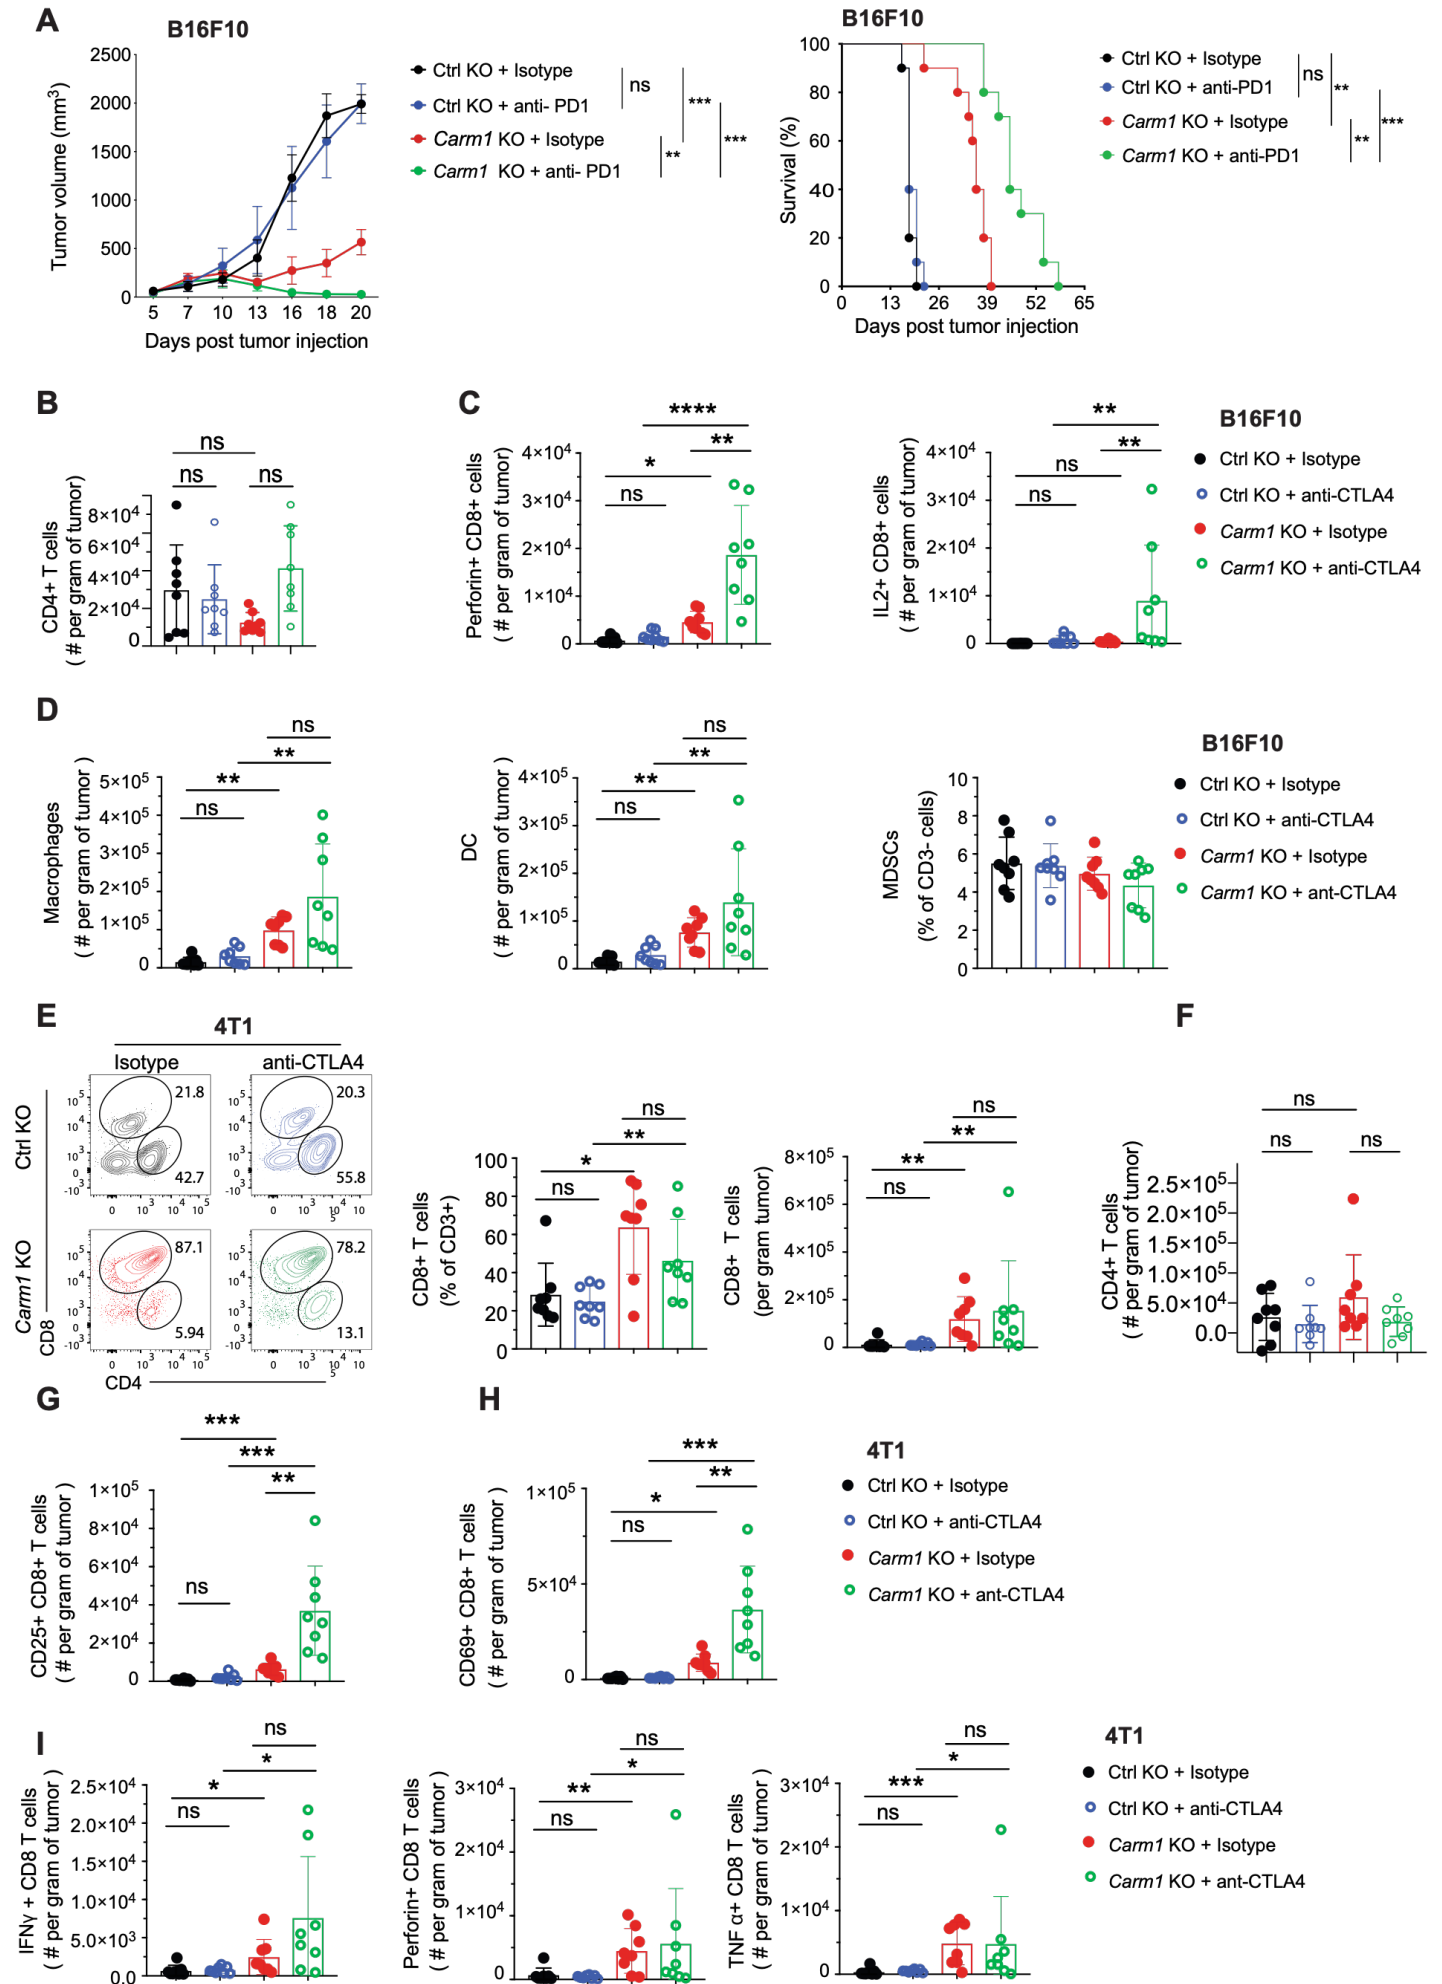

**Figure S6. *Carm1* inactivation sensitizes resistant tumors to treatment with CTLA-4 or PD-1 mAbs. Related to Figure 5.**

- A.** Treatment of *Carm1*-KO or control-KO B16F10 tumors with PD-1 or isotype control antibodies (n=8 mice/group). Tumor growth (left) and survival of tumor bearing mice (right) are shown.
- B.** Quantification of CD4 T cells (number per gram of tumor) in *Carm1*-KO and control-KO B16F10 tumors following treatment with anti-CTLA4 or control mAbs, n=8/group.
- C.** Number of intra-tumoral perforin+ CD8+ (left) and IL2+ CD8+ (right) T cells (per gram of tumor) in *Carm1*-KO and control-KO B16F10 tumors following treatment with anti-CTLA4 or control mAbs, n=8/group.
- D.** Number of intra-tumoral macrophages (live, singlet, CD45+ CD3- F4/80+) (left) and dendritic cells (DCs) (live, singlet, CD45+ CD3- F4/80- CD11c+ MHCII<sup>hi</sup>) (middle) calculated per gram of tumor. Quantification of myeloid derived suppressor (MDSCs) (CD45+/CD3-/F4/80-/Gr1+, as percentage of CD3- cells) (right). Myeloid cells were analyzed in *Carm1*-KO and control-KO B16 tumors following treatment with anti-CTLA4 or control mAbs, n=8/group.
- E.** Analysis of *Carm1*-KO and control-KO 4T1 tumors following treatment with anti-CTLA4 or control mAbs. Contour plot show percentage of CD4 and CD8 positive intra-tumoral T cells (left). Quantification of percentage (middle) and number (right) of CD8+ T cells for indicated treatment groups.
- F.** Quantification of CD4+ T cells (number per gram of tumor) for indicated treatment groups in 4T1 tumor model.
- G.** Quantification of CD25+ intra-tumoral CD8+ T cells for indicated treatment groups in the 4T1 tumor model.
- H.** Quantification of CD69+ intra-tumoral CD8+ T cells for indicated treatment groups in the 4T1 tumor model.
- I.** Quantification of IFN $\gamma$  (left), perforin (middle) and TNF $\alpha$  (right) positive intra-tumoral CD8+ T cells for indicated treatment groups in the 4T1 tumor model.



Data shown are representative of two independent experiments with 8 mice per group. No outliers were removed. Bar graphs represent data summarized as mean  $\pm$  S.E.M and were analyzed by unpaired two-sided Mann-Whitney test, \*\*\*\*P < 0.0001; \*\*\*P < 0.001; \*\*P < 0.01; \*P < 0.05; n.s., non-significant.

Figure S7

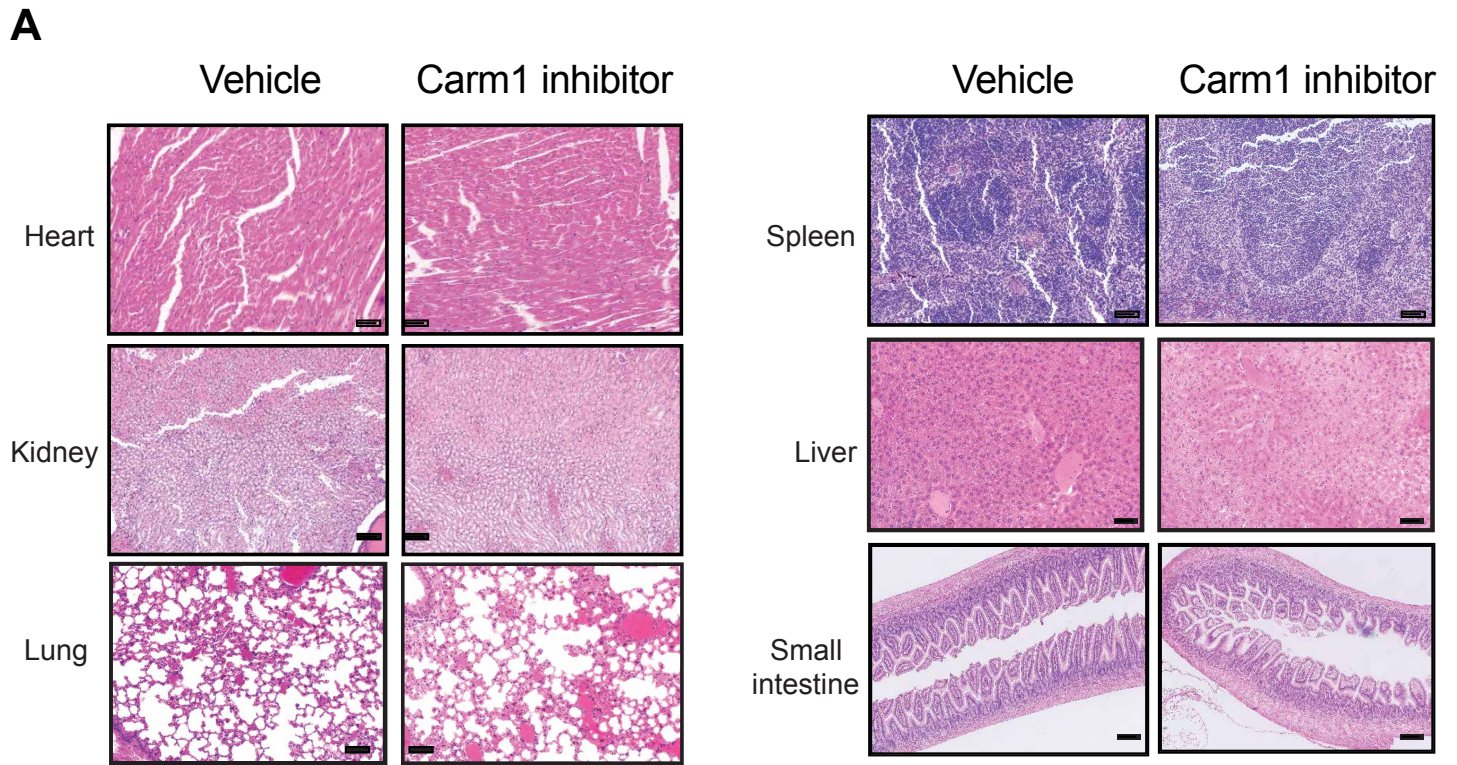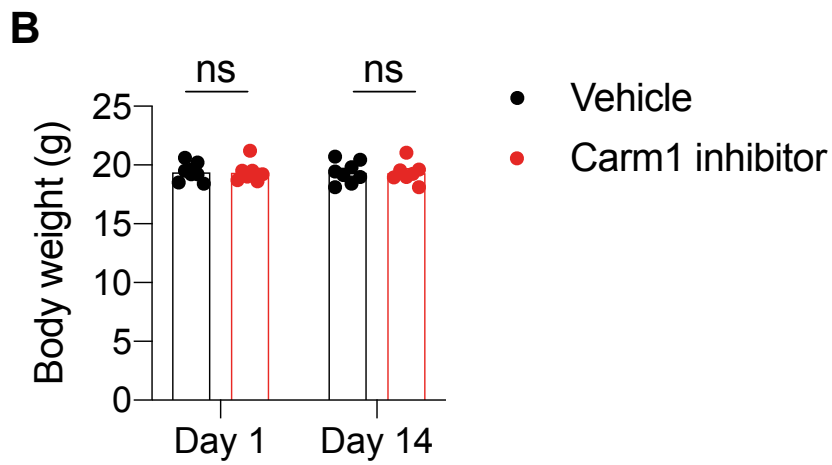

**Figure S7. Evaluation of potential toxicity of Carm1 inhibitor (EZM2302) in C57Bl/6 mouse model. Related to Figure 5.**

- A.** Histopathological evaluation of major organs for assessment of potential toxicity of Carm1 inhibitor. Sex and age matched C57Bl/6 mice were randomized into two groups treated twice daily with either CARM1 inhibitor (150mg/kg) or vehicle via oral gavage for 14 days. Major organs including heart, spleen, kidney, liver, lung and small intestine were harvested for pathological assessment. Representative images of histopathological images (H&E stain) from vehicle or Carm1 inhibitor treated mice are shown (n=8/group). Scale bar = 50µM
- B.** Analysis of body weight of sex and age matched C57Bl/6 mice treated twice daily with CARM1 inhibitor (150mg/kg) or vehicle via oral gavage for 14 days (n=8/group).

Figure S8

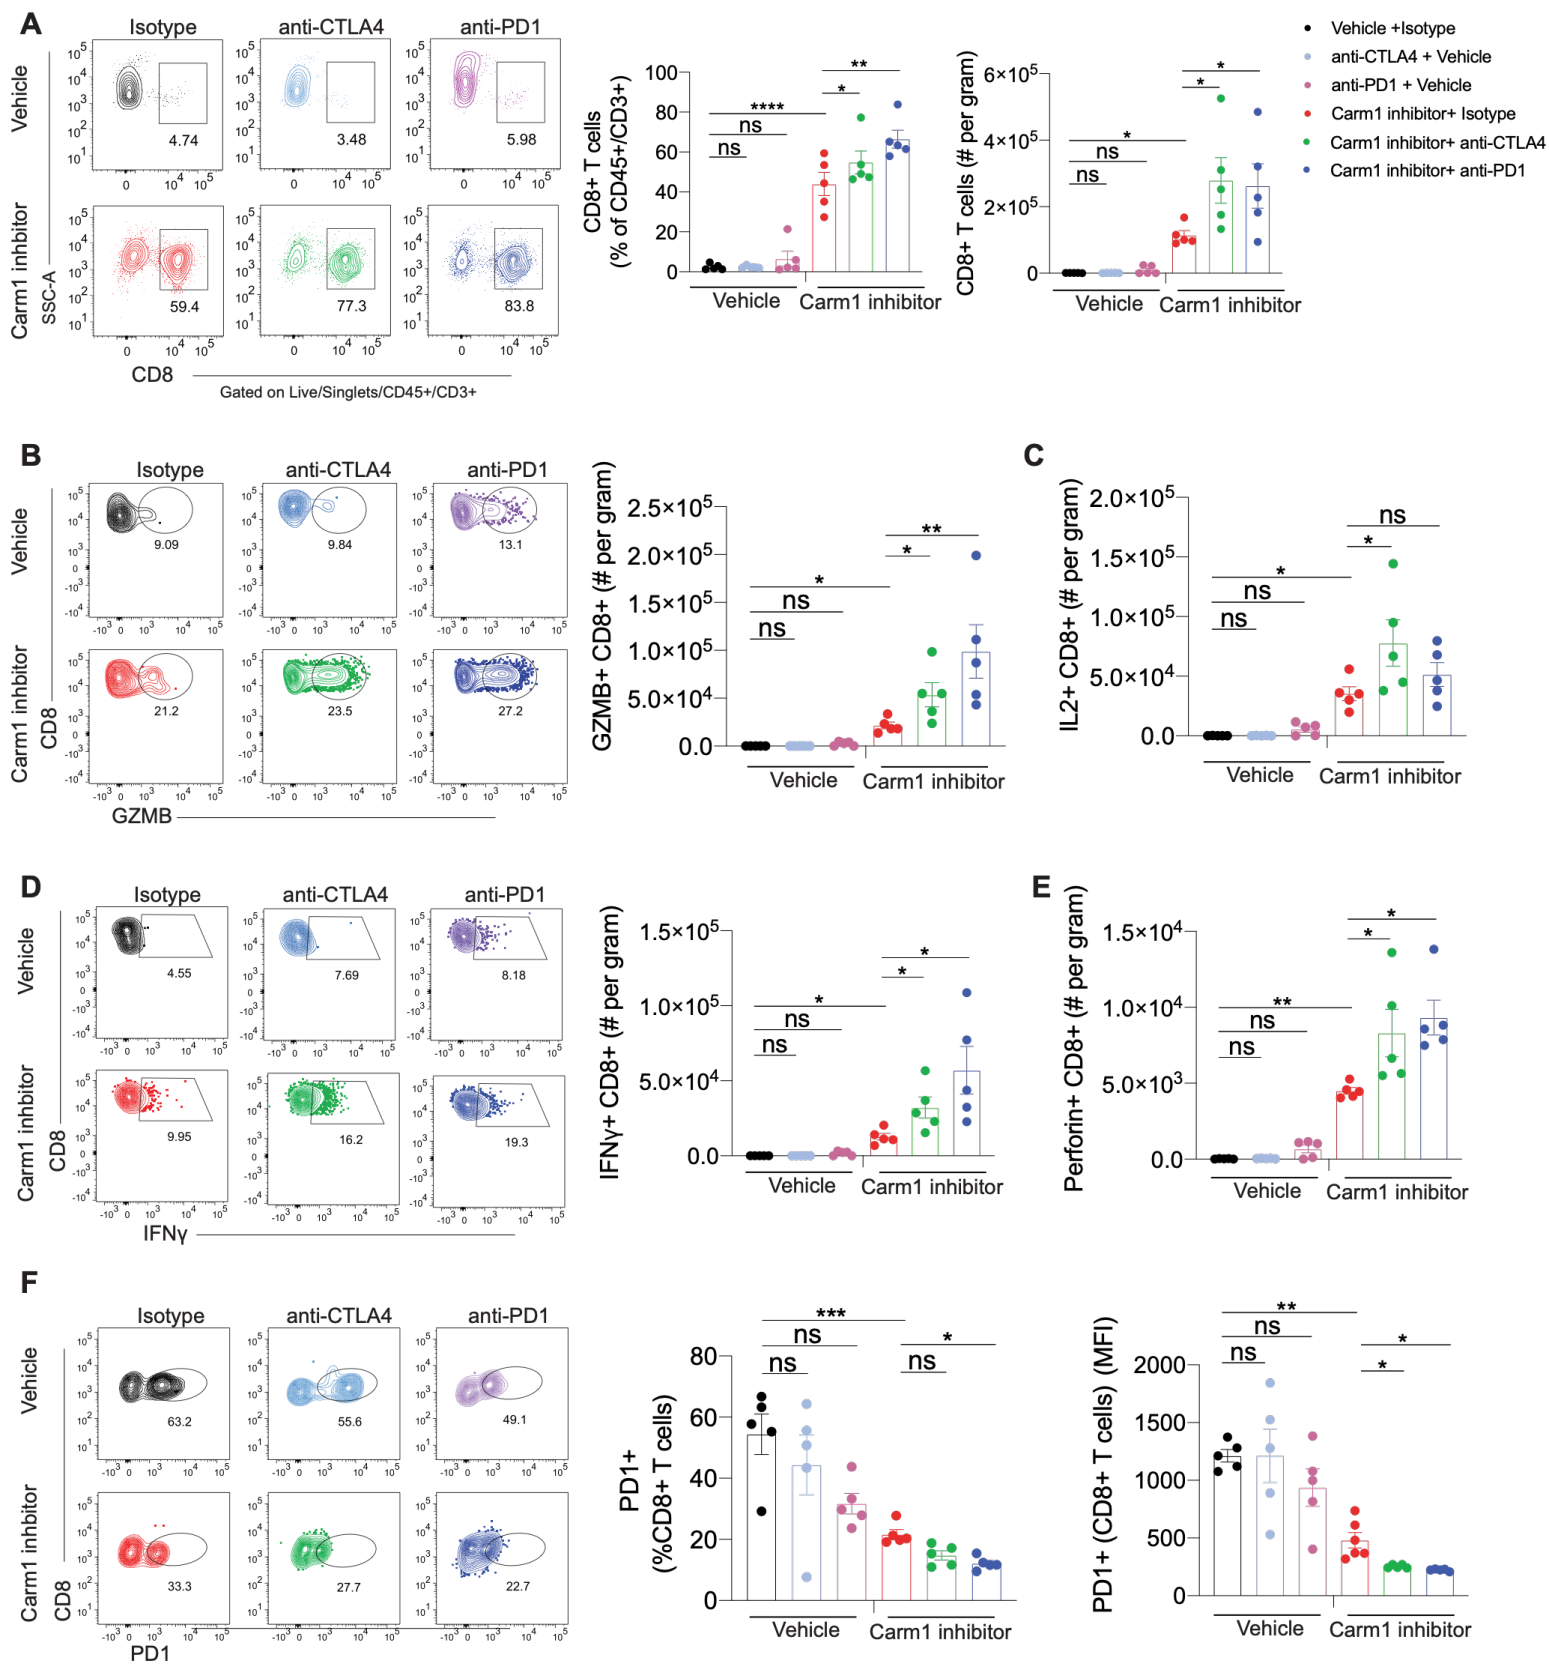

**Figure S8. Changes in tumor microenvironment induced by monotherapy or combination therapy with CARM1 inhibitor. Related to Figure 5.**

- A.** Treatment of mice with B16F10 melanomas with CARM1 inhibitor or vehicle control. Mice also received isotype control, CTLA-4 or PD-1 mAbs, as indicated (n=5 mice/group). Representative flow plots of CD8 T cells gated on live/singlets/CD45+/CD3+ cells from indicated groups are shown on left. Quantification of CD8 T cells is shown as percentage of CD3+ T cells (middle) or number per gram of tumor (right) for the indicated treatment groups.
- B.** Number of intra-tumoral granzyme B+ CD8+ T cells per gram of tumor for the indicated treatment groups (n=5 mice/group). Representative flow plots are shown on left.
- C.** Number of intra-tumoral IL2+ CD8+ T cells per gram of tumor for the indicated treatment groups (n=5 mice/group).
- D.** Number of intra-tumoral IFN $\gamma$ + CD8+ T cells per gram of tumor for the indicated treatment groups (n=5 mice/group). Representative flow plots are shown on left.
- E.** Number of intra-tumoral perforin+ CD8+ T cells per gram of tumor for the indicated treatment groups (n=5 mice/group).
- F.** Analysis of intra-tumoral PD1+ CD8+ T cells (quantified as percentage of CD8+ T cells) for the indicated treatment groups (n=5 mice/group). Representative flow plots (left) and quantification of PD-1 expression as percentage of CD8 T cells (middle) or MFI (right) are shown.

Figure S9

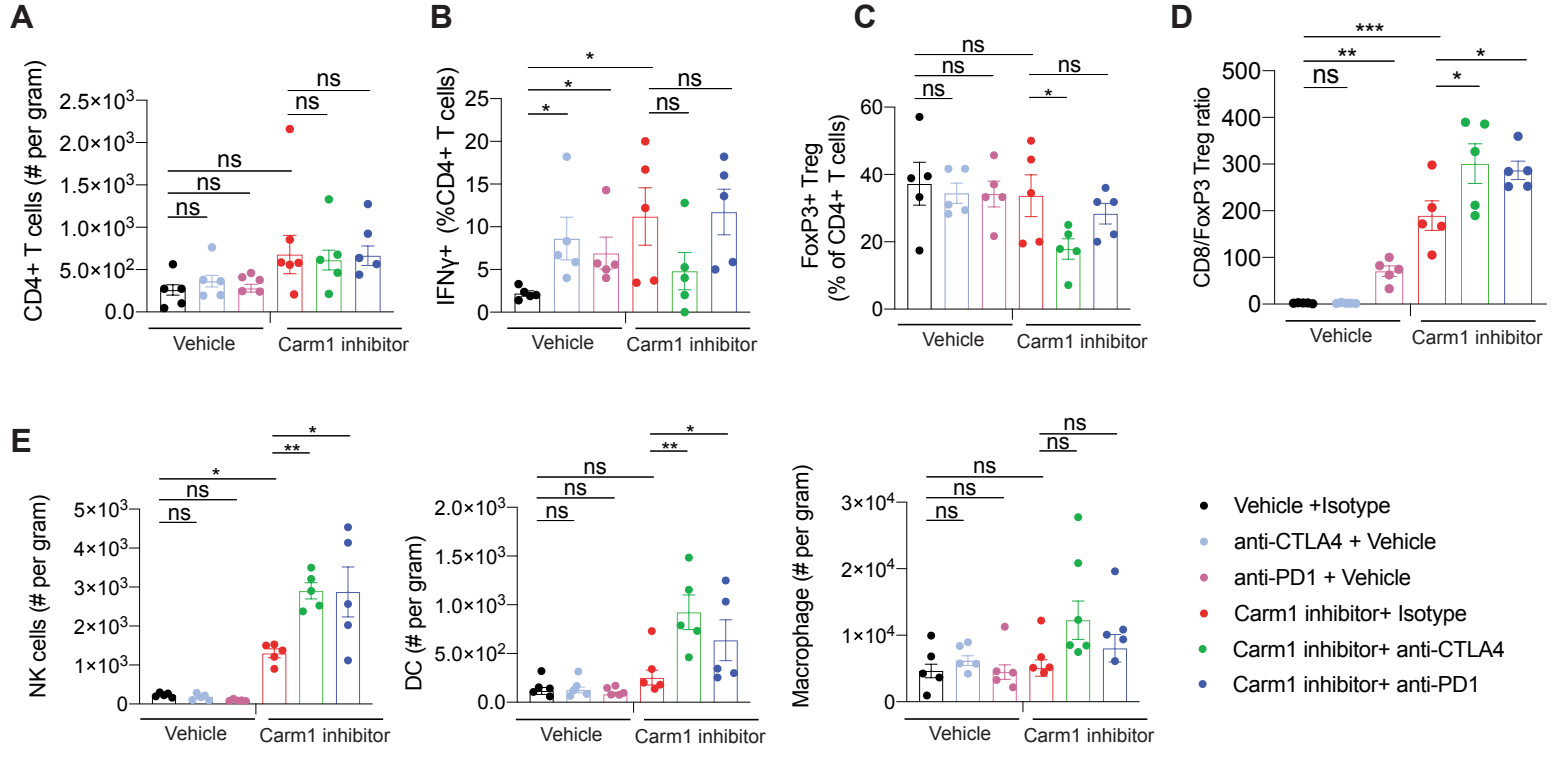

**Figure S9. Changes in tumor microenvironment induced by monotherapy or combination therapy with CARM1 inhibitor. Related to Figure 5.**

Treatment of mice with B16F10 melanomas with CARM1 inhibitor or vehicle control. Mice also received isotype control, CTLA-4 or PD-1 mAbs, as indicated (n=5 mice/group).

- A.** Quantification of CD4<sup>+</sup> T cells (number per gram of tumor) for the indicated treatment groups.
- B.** Quantification of IFN $\gamma$ <sup>+</sup> cells (as percentage of CD4<sup>+</sup> T cells) for the indicated treatment groups.
- C.** Quantification of FoxP3<sup>+</sup> Treg cells (as percentage of CD4<sup>+</sup> T cells) for the indicated treatment groups.
- D.** Quantification of the CD8/FoxP3 Treg ratio for the indicated treatment groups.
- E.** Number of intra-tumoral NK cells (left), dendritic cells (live, singlet, CD45<sup>+</sup> CD3<sup>-</sup> F4/80<sup>-</sup> CD11c<sup>+</sup> MHCII<sup>hi</sup>) (middle) and macrophages (live, singlet, CD45<sup>+</sup> CD3<sup>-</sup> F4/80<sup>+</sup>) (right) calculated per gram of tumor.

Figure S10

**A**

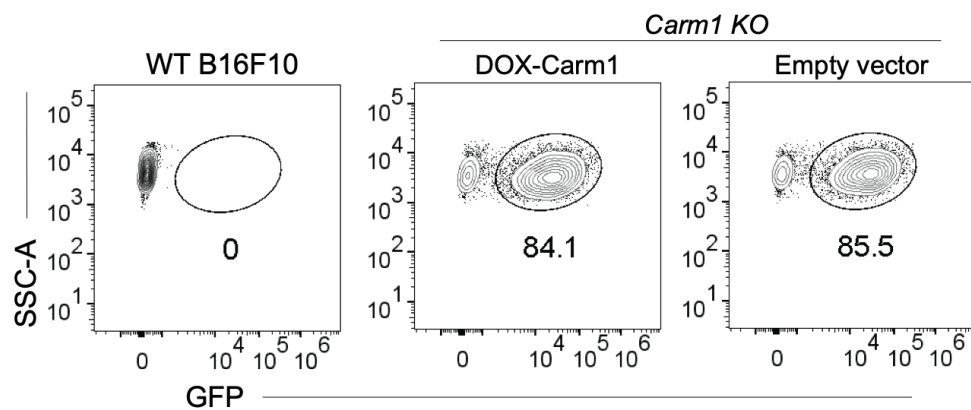

**B**

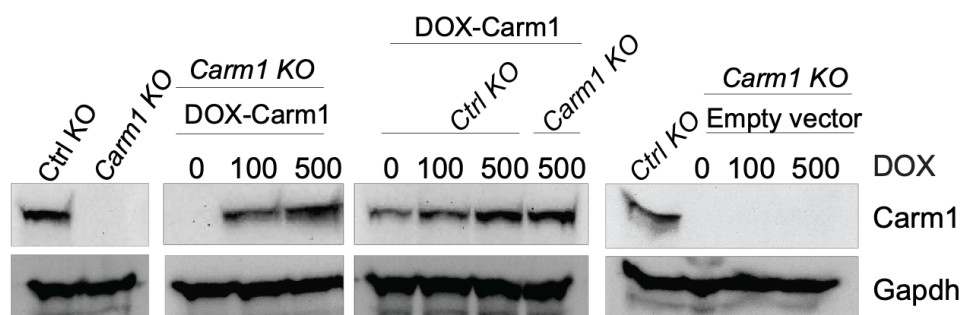

**C**

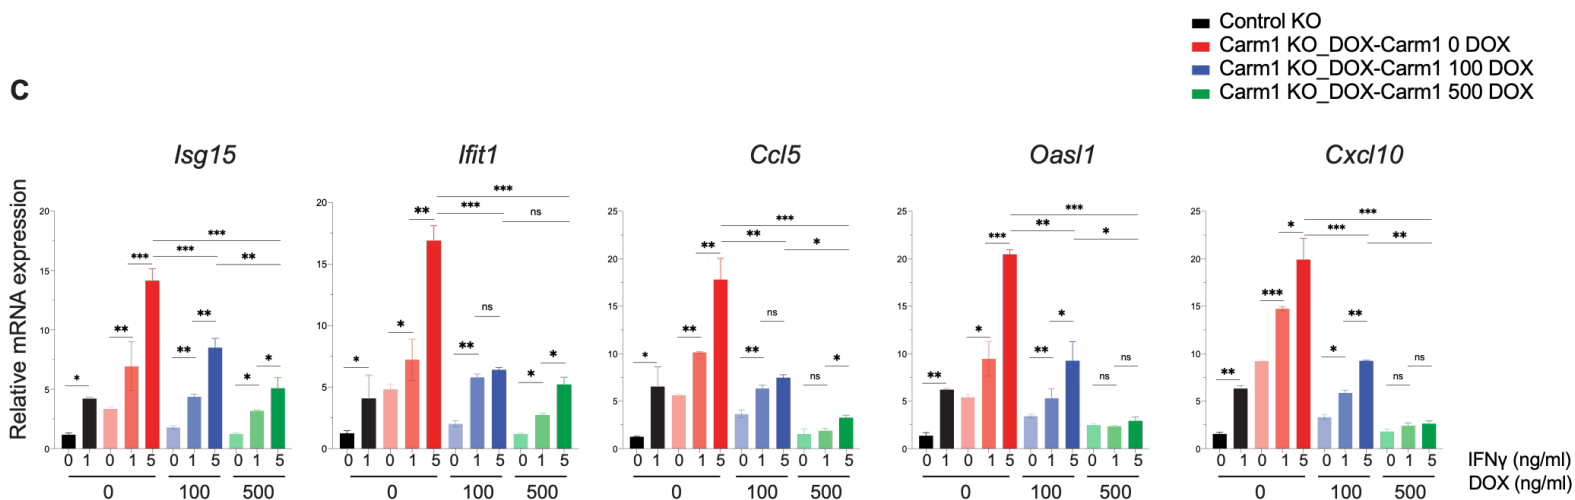

**D**

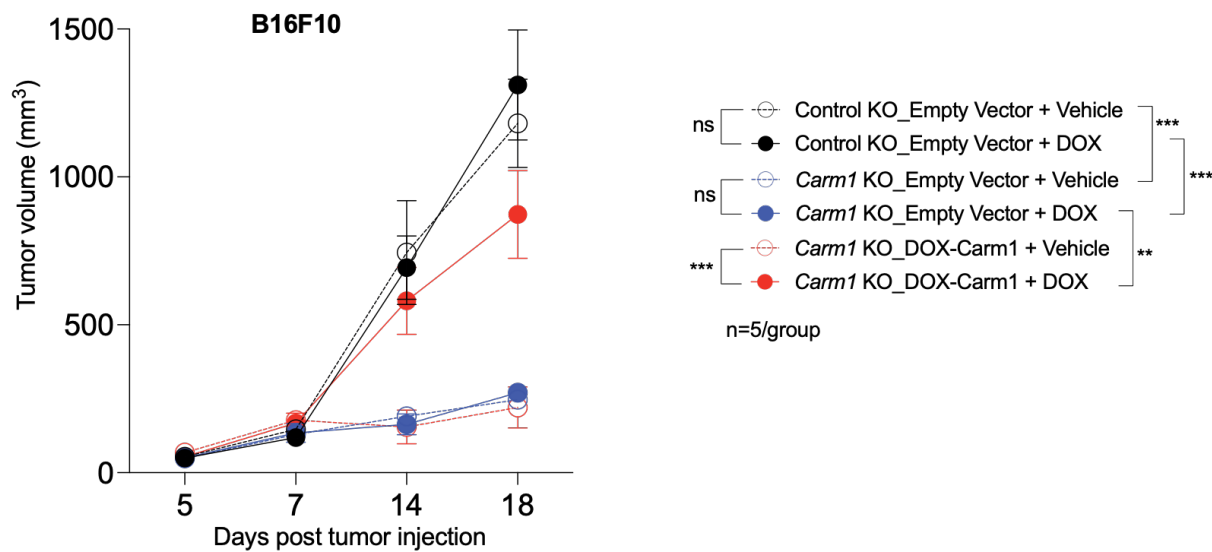



**Figure S10. Reconstitution of *Carm1* gene expression using a doxycycline-inducible promoter reverses the *Carm1* knockout phenotype. Related to Figure 5.**

- A.** Transduction of *Carm1*-KO B16F10 cells with a lentiviral vector (DOX-*Carm1*) driving expression of a *Carm1* cDNA under the control of a doxycycline (DOX) inducible promoter. Representative flow plots are shown following sorting of GFP<sup>+</sup> cells for tumor cells transduced with DOX-*Carm1* or empty vectors.
- B.** Western blot validation of *Carm1* protein expression following DOX induction for 7 days in the indicated cell populations. *Gapdh* is shown as loading control.
- C.** RT-qPCR analysis of selected ISGs. *Carm1*-KO cells expressing the DOX-inducible *Carm1* cDNA were treated with doxycycline (0, 100 or 500 ng/ml) for 7 days and then treated overnight with IFN $\gamma$  (0, 1 or 5 ng/ml) (n=3/group). Control-KO cells not treated with IFN $\gamma$  were included for comparison.
- D.** Growth of B16F10 melanomas was compared for the following conditions: control-KO tumor cells transduced with the empty vector, *Carm1*-KO tumor cells transduced with the empty vector and *Carm1* KO tumor cells transduced with DOX-*Carm1* vector. For each of these groups, mice were fed a regular diet or a doxycycline-containing diet (625ppm, Envigo Teclad) post tumor cell injection until the experimental endpoint (18 days).

Figure S11

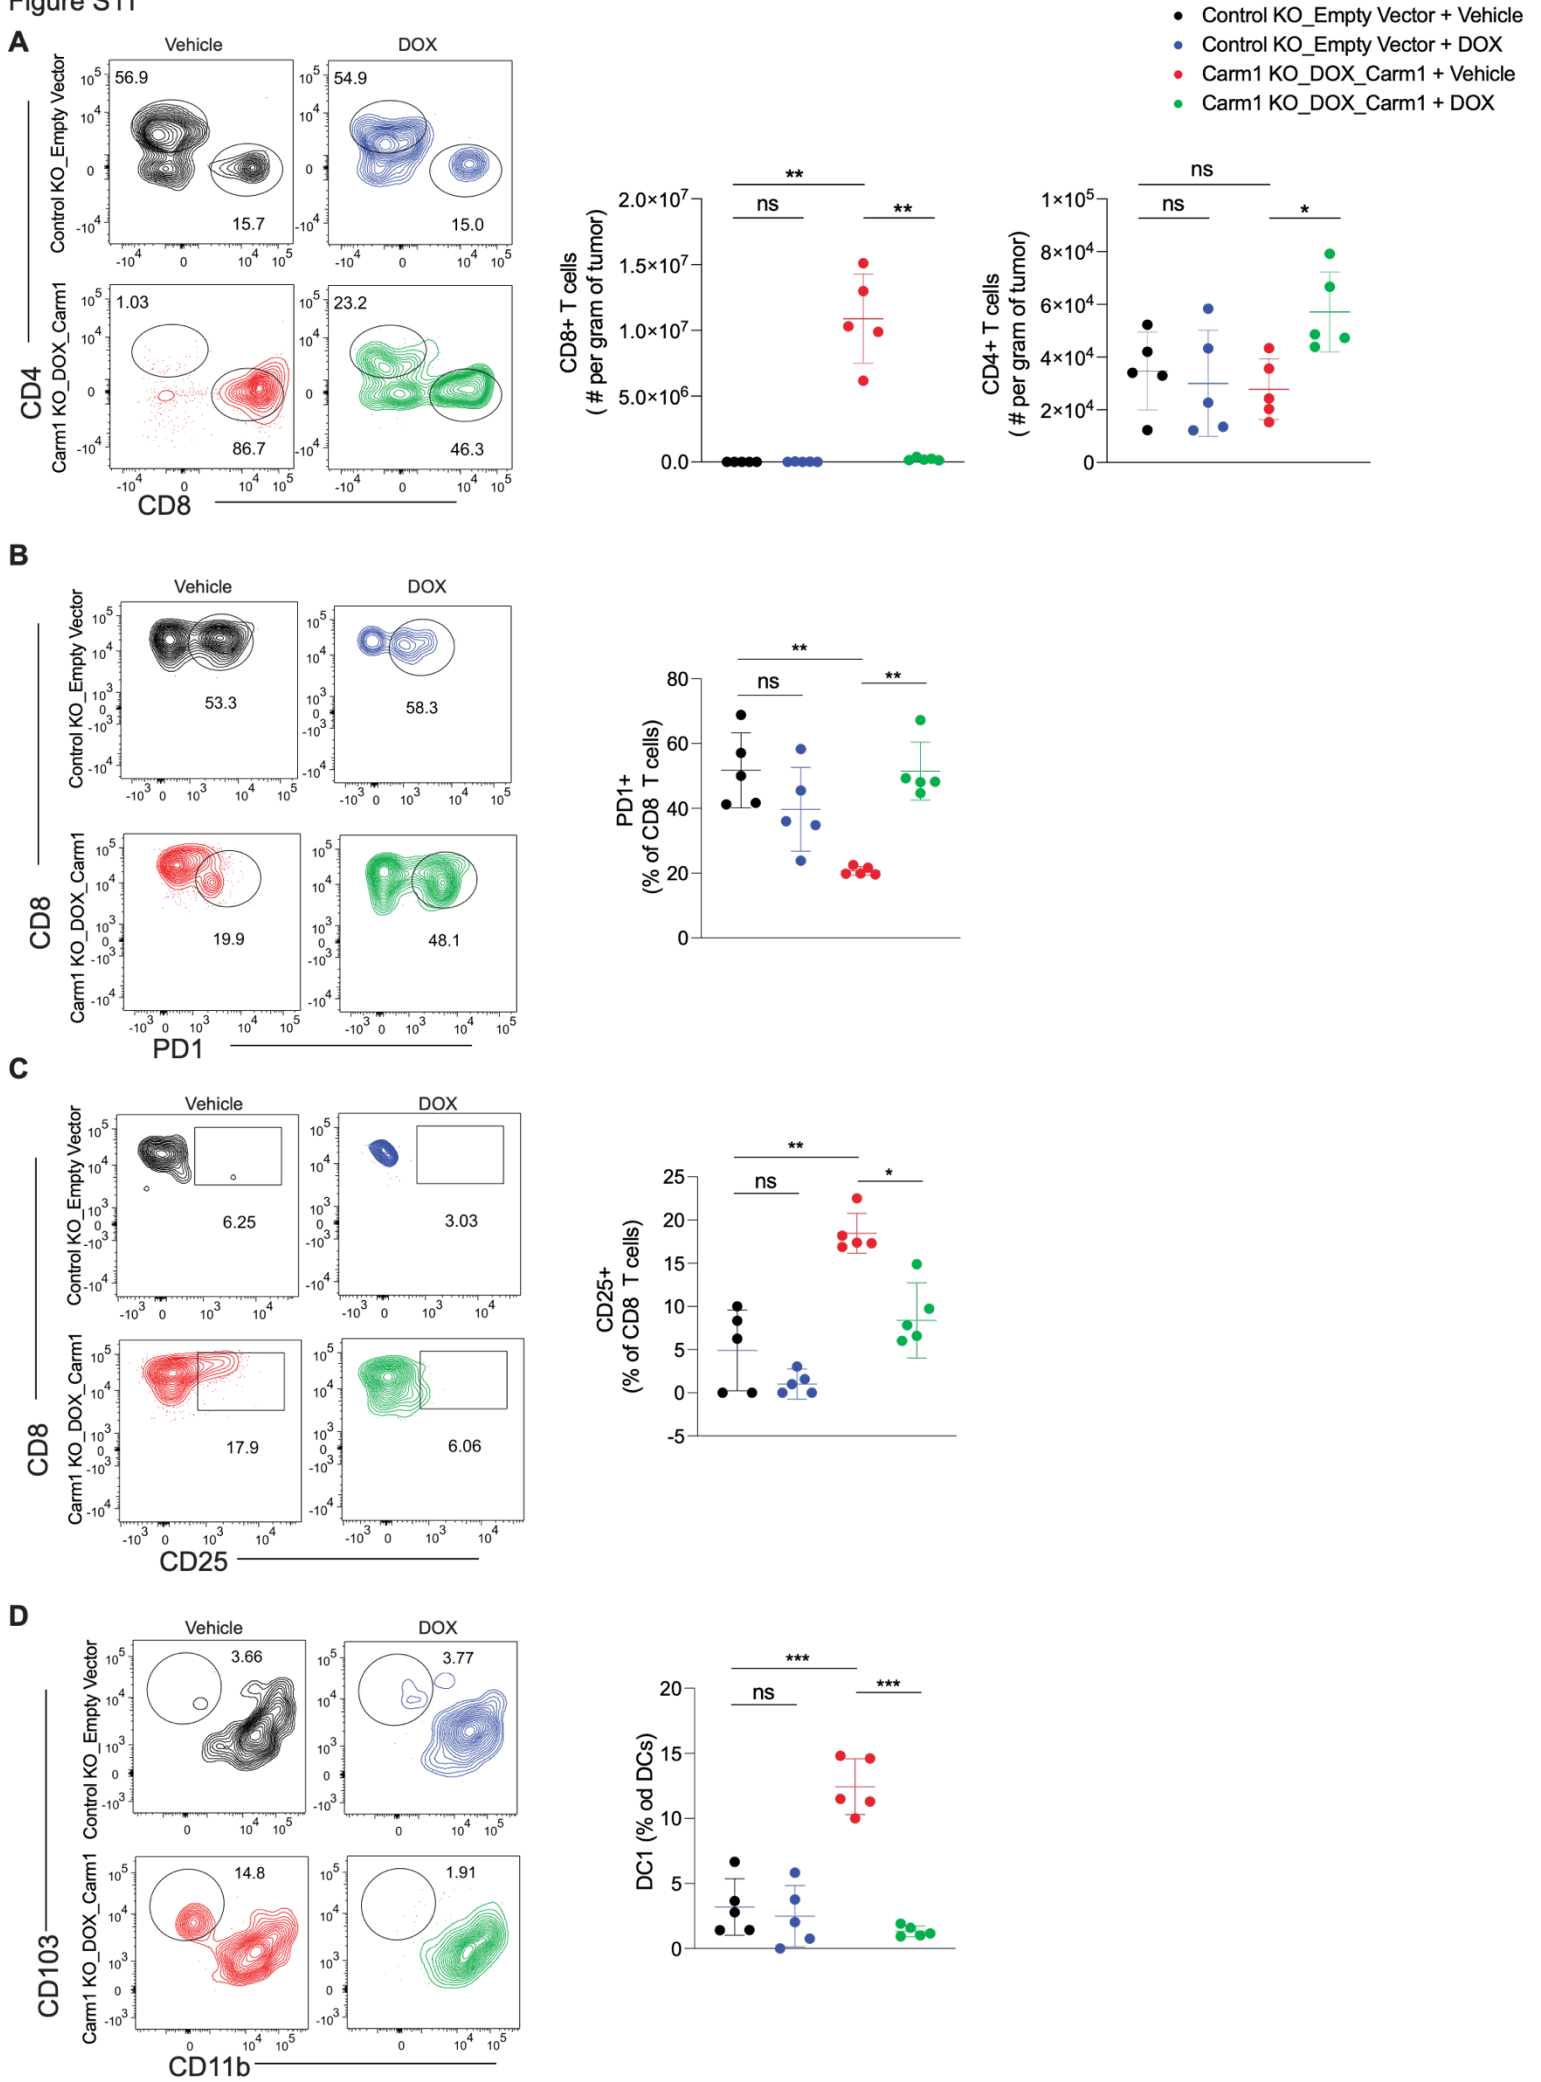

**Figure S11. Reconstitution of *Carm1* gene expression using a doxycycline-inducible promoter reverses the favorable changes in the tumor microenvironment. Related to Figure 5.**

Control-KO B16F10 tumor cells transduced with the empty lentiviral vector or *Carm1*-KO tumor cells expressing the DOX-*Carm1* cDNA were implanted into C57Bl/6 mice. Mice with either type of tumor cells were fed a regular diet or a doxycycline-containing diet (625ppm, Envigo Teclad) post tumor cell injection until the experimental endpoint (18 days).

- A.** CD8 and CD4 T cell infiltration was analyzed for the indicated treatment groups (n=5 mice/group). Contour plots show percentage of CD4+ and CD8+ intra-tumoral T cells (left). Summary graphs show quantification of CD8 and CD4 T cells as number per gram of tumor (right).
- B.** Quantification of PD-1+ intra-tumoral CD8+ T cells for the indicated treatment groups (right). Contour plots (left) show percentage of CD8+ PD-1+ positive intra-tumoral T cells, n=5/group.
- C.** Quantification of CD25+ intra-tumoral CD8+ T cells for the indicated treatment groups (right). Contour plots (left) show percentage of CD8+ T cells that are CD25 positive, n=5/group.
- D.** Characterization of intra-tumoral cDC1 cells. Contour plot show percentage of CD103+CD11b- cDC1s (gated on live, singlet, CD45+ CD3- F4/80- CD11c+ MHCIIhi) (left). Summary plot shows percentage of cDC1 (CD103+CD11b-) cells as percentage of total DCs (right), n=5/group.

Figure S12

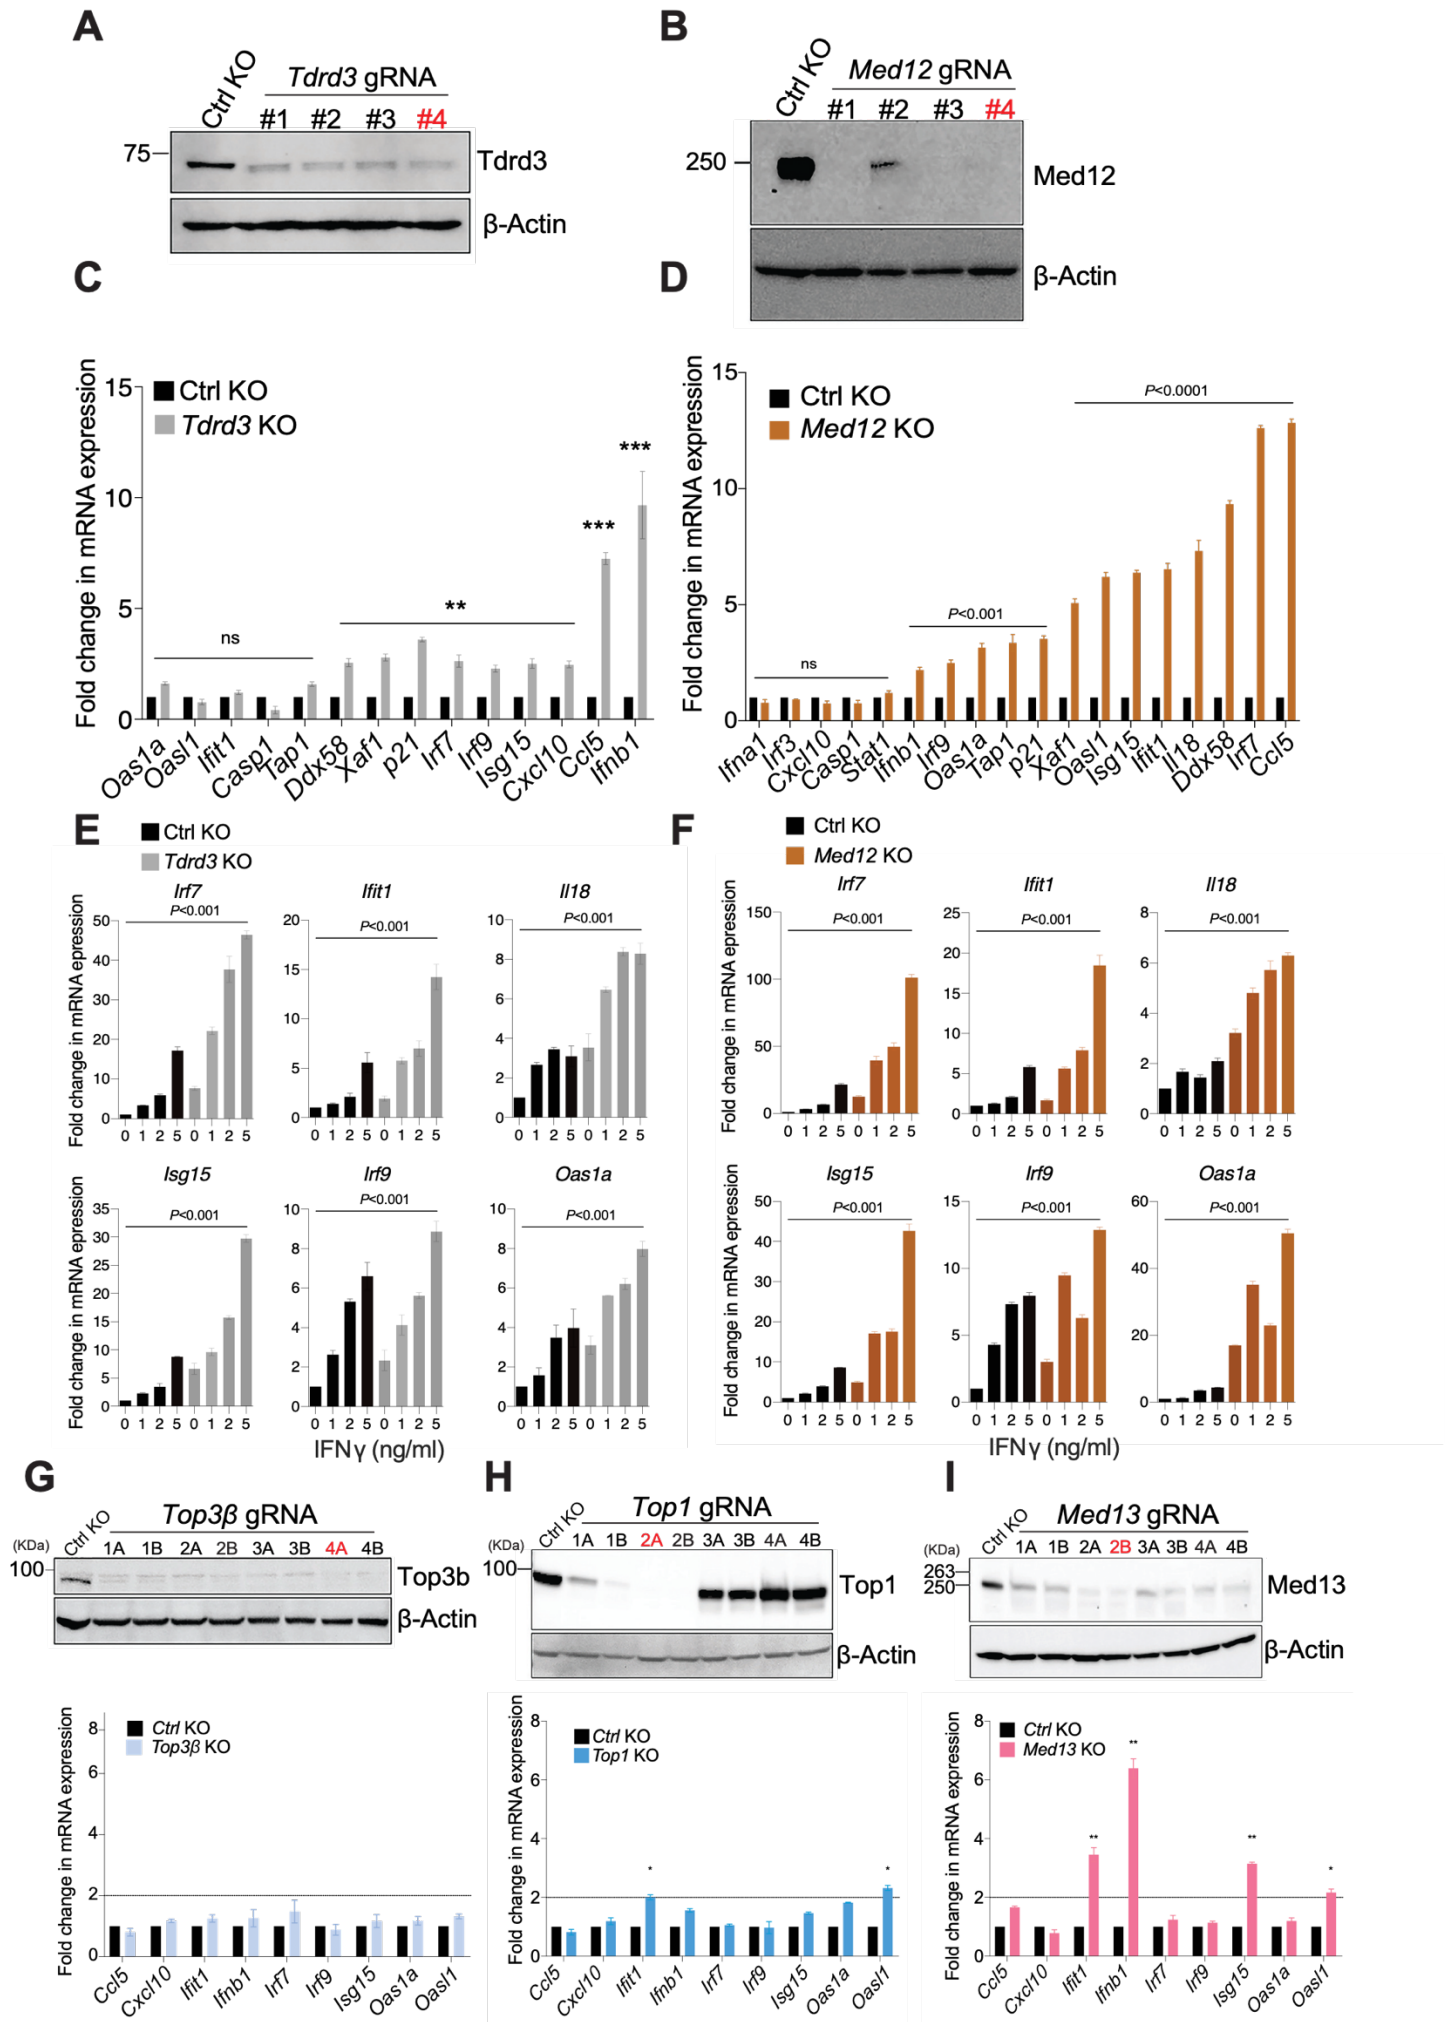

**Figure S12. Inactivation of *Tdrd3* and *Med12* genes results in a similar phenotype as inactivation of *Carm1* gene. Related to Figure 6.**

- A.** *Tdrd3* protein levels in B16F10 cells edited with *Tdrd3* or control (Ctrl) gRNAs. Replicates of different lines edited with same gRNA are shown. Cell line highlighted in red was used for experiments.
- B.** *Med12* protein levels in B16F10 cells edited with *Med12* or control gRNAs. Replicates of different lines edited with the same gRNA are shown.
- C.** RT-qPCR analysis of selected ISGs and IFNs in *Tdrd3*-KO and control-KO B16F10 cells (n=4/group).
- D.** RT-qPCR analysis of transcripts of selected ISGs and IFNs in *Med12*-KO and control-KO B16F10 cells (n=4/group).
- E.** Response of *Tdrd3*-KO and control-KO B16F10 cells to IFN $\gamma$  stimulation. RT-qPCR analysis of transcripts of selected ISGs and IFNs following overnight stimulation with the indicated concentrations of IFN $\gamma$  (n=4/group).
- F.** Response of *Med12*-KO and control-KO B16F10 cells to IFN $\gamma$  stimulation. RT-qPCR analysis of transcripts of selected ISGs and IFNs following overnight stimulation with the indicated concentrations of IFN $\gamma$  (n=4/group).
- G-I.** Western blot validation of *Top3b* (**G**), *Top1* (**H**) and *Med13* (**I**) editing in B16F10 cells. RT-qPCR analysis was performed for selected ISGs and IFNs in indicated cell lines (bottom) (n=4/group).

Data shown are representative of two independent experiments with 4 replicates/group. Mann-Whitney test was used to determine significance, \*\*\*P < 0.001; \*\*P < 0.01; \*P < 0.05; n.s., not significant.

Figure S13

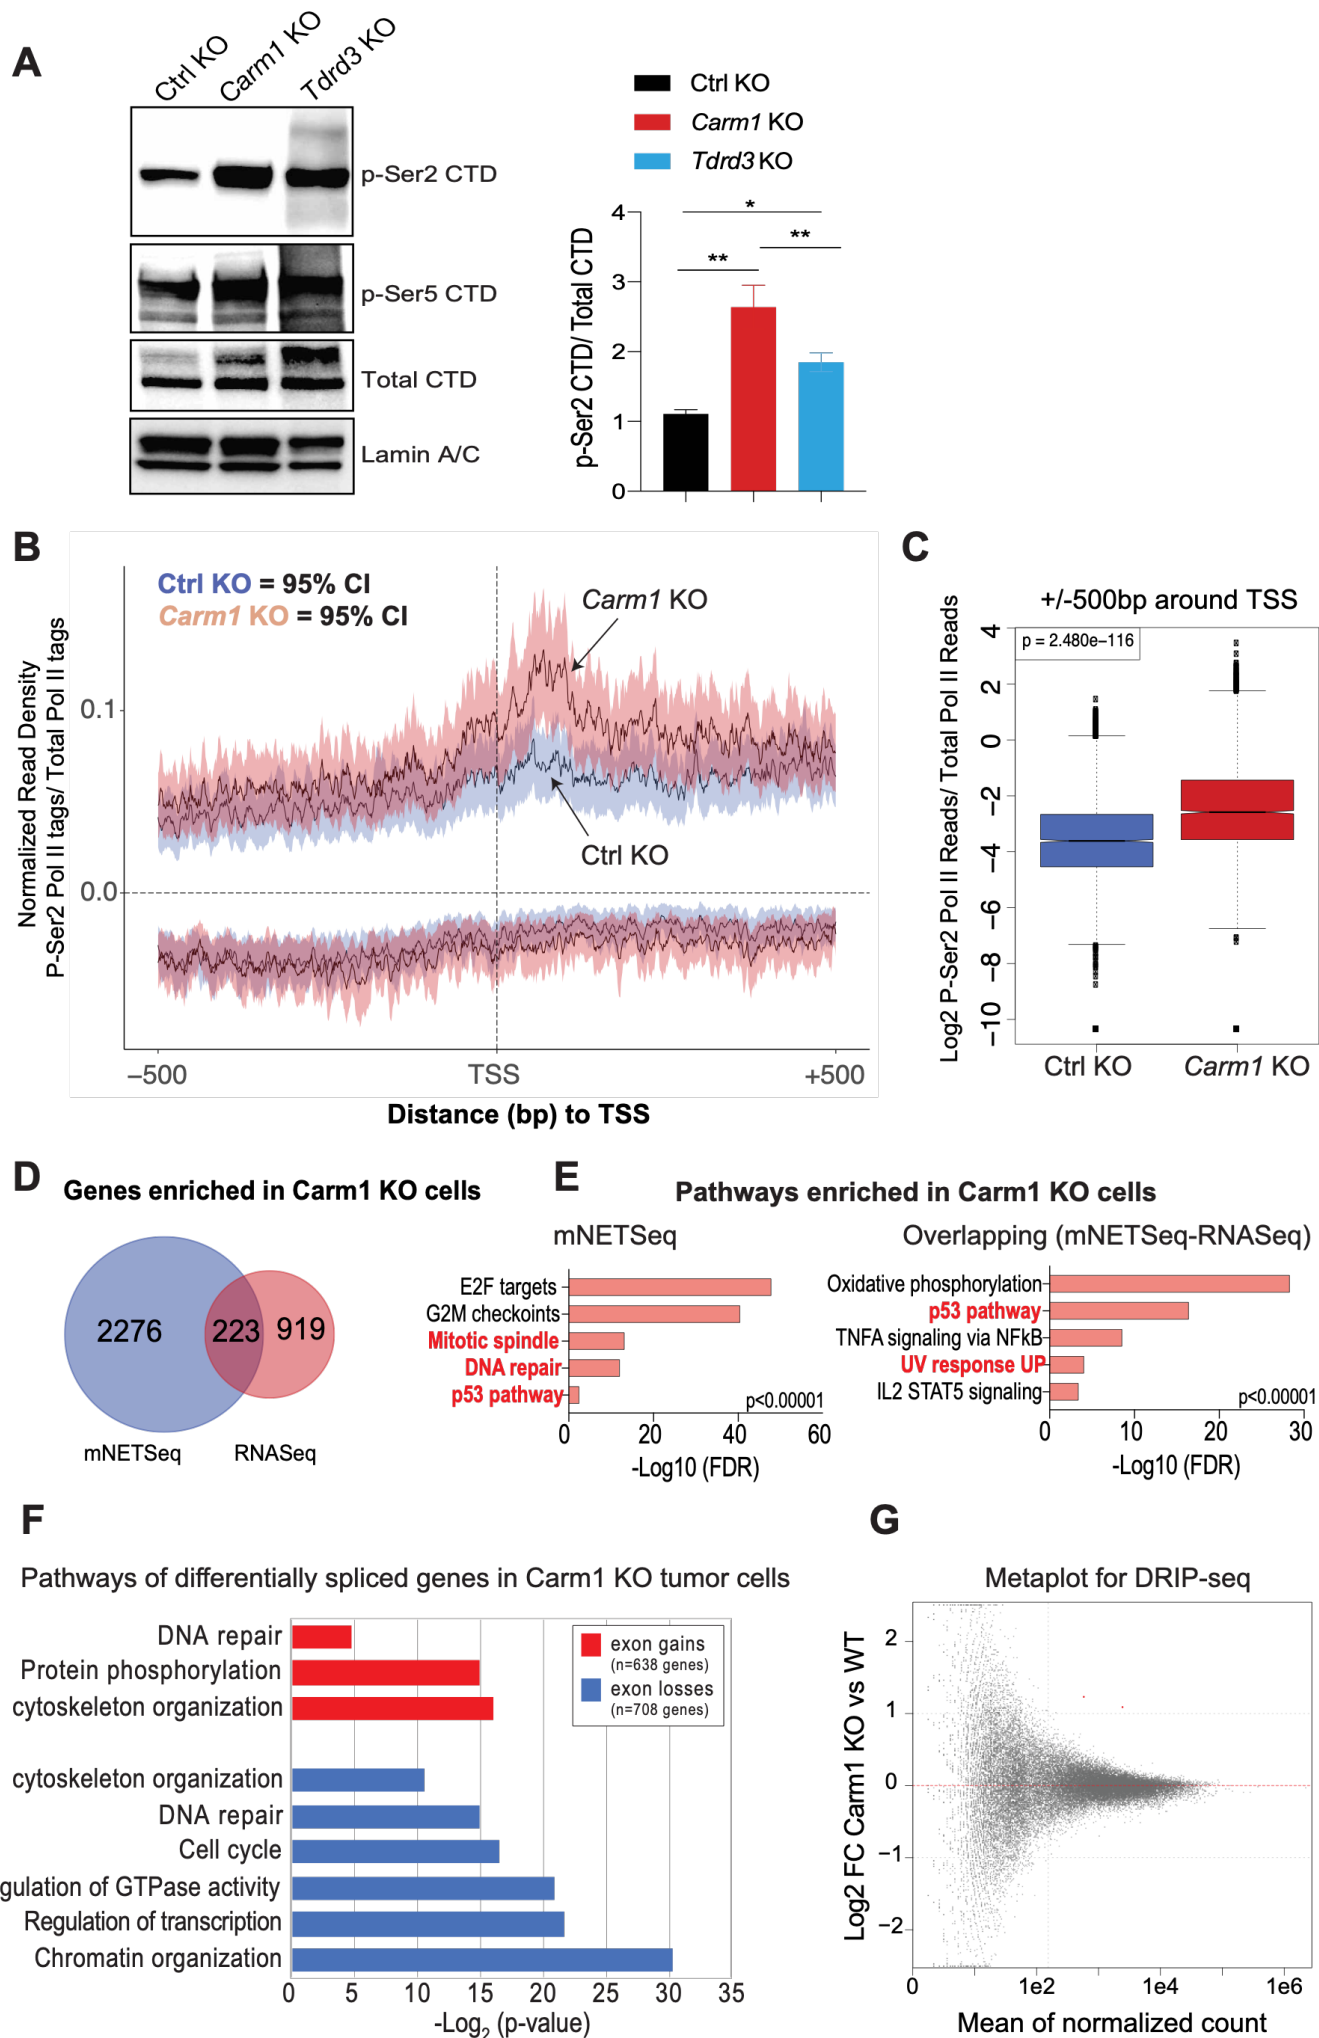

**Figure S13. Alterations in transcription in *Carm1*-KO tumor cells. Related to Figure 6.**

- A.** Western blot analysis of nuclear lysates from control-KO, *Carm1*-KO or *Tdrd3*-KO B16F10 cells. Equal quantities of nuclear protein extracts from indicated cell lines were probed using antibodies specific for phosphorylated (p-Ser2 CTD and p-Ser5) or non-phosphorylated (total) C-terminal domain of RNA Pol II (CTD). Lamin A/C was used as loading control (left). Fraction of phosphorylated RNA Pol II was estimated by normalizing p-Ser2 CTD to total CTD levels (right). Data shown are representative of three experiments.
- B.** Ratio of normalized P-Ser2 Pol II and total Pol II mNET-Seq signals within 500 bp of transcription start sites (TSS) of expressed protein-encoding genes in *Carm1*-KO (red) and control-KO (blue) cells. Shaded region indicates a 95% confidence interval.
- C.** Boxplots representing the ratio of P-Ser2 Pol II to total Pol II mNET-Seq reads within 500 bp of TSS in *Carm1*-KO (red) and in control-KO (blue) cells.
- D.** Venn diagram showing overlap between genes with increased normalized P-Ser2 RNA Pol II reads (shown as mNETSeq, blue) and genes with higher expression (shown as RNASeq, red) in *Carm1*-KO relative to control-KO B16F10 cells.
- E.** Top enriched pathways from GSEA analysis of genes with increased normalized P-Ser2 RNA Pol II reads (all 2,837 mNETSeq genes, blue) (left) in *Carm1*-KO compared to control-KO B16F10 cells. GSEA analysis for 275 overlapping genes between mNETSeq and RNASeq (right).
- F.** Pathway analysis of differentially spliced genes in *Carm1*-KO tumor cells. Differential splicing analysis was conducted using DESeq2 using  $\log_2(\text{FC})$  greater than 2-fold and adjusted p-value  $< 0.05$  as statistical thresholds. Enriched gene ontologies were identified using the String Database. Number of exon gains and losses are shown in inset.
- G.** Metaplot for DRIPseq (DNA-RNA immunoprecipitation analysis) representing the  $\log_2$  fold change in mean normalized count of peaks in *Carm1*-KO and control-KO cells.

Figure S14

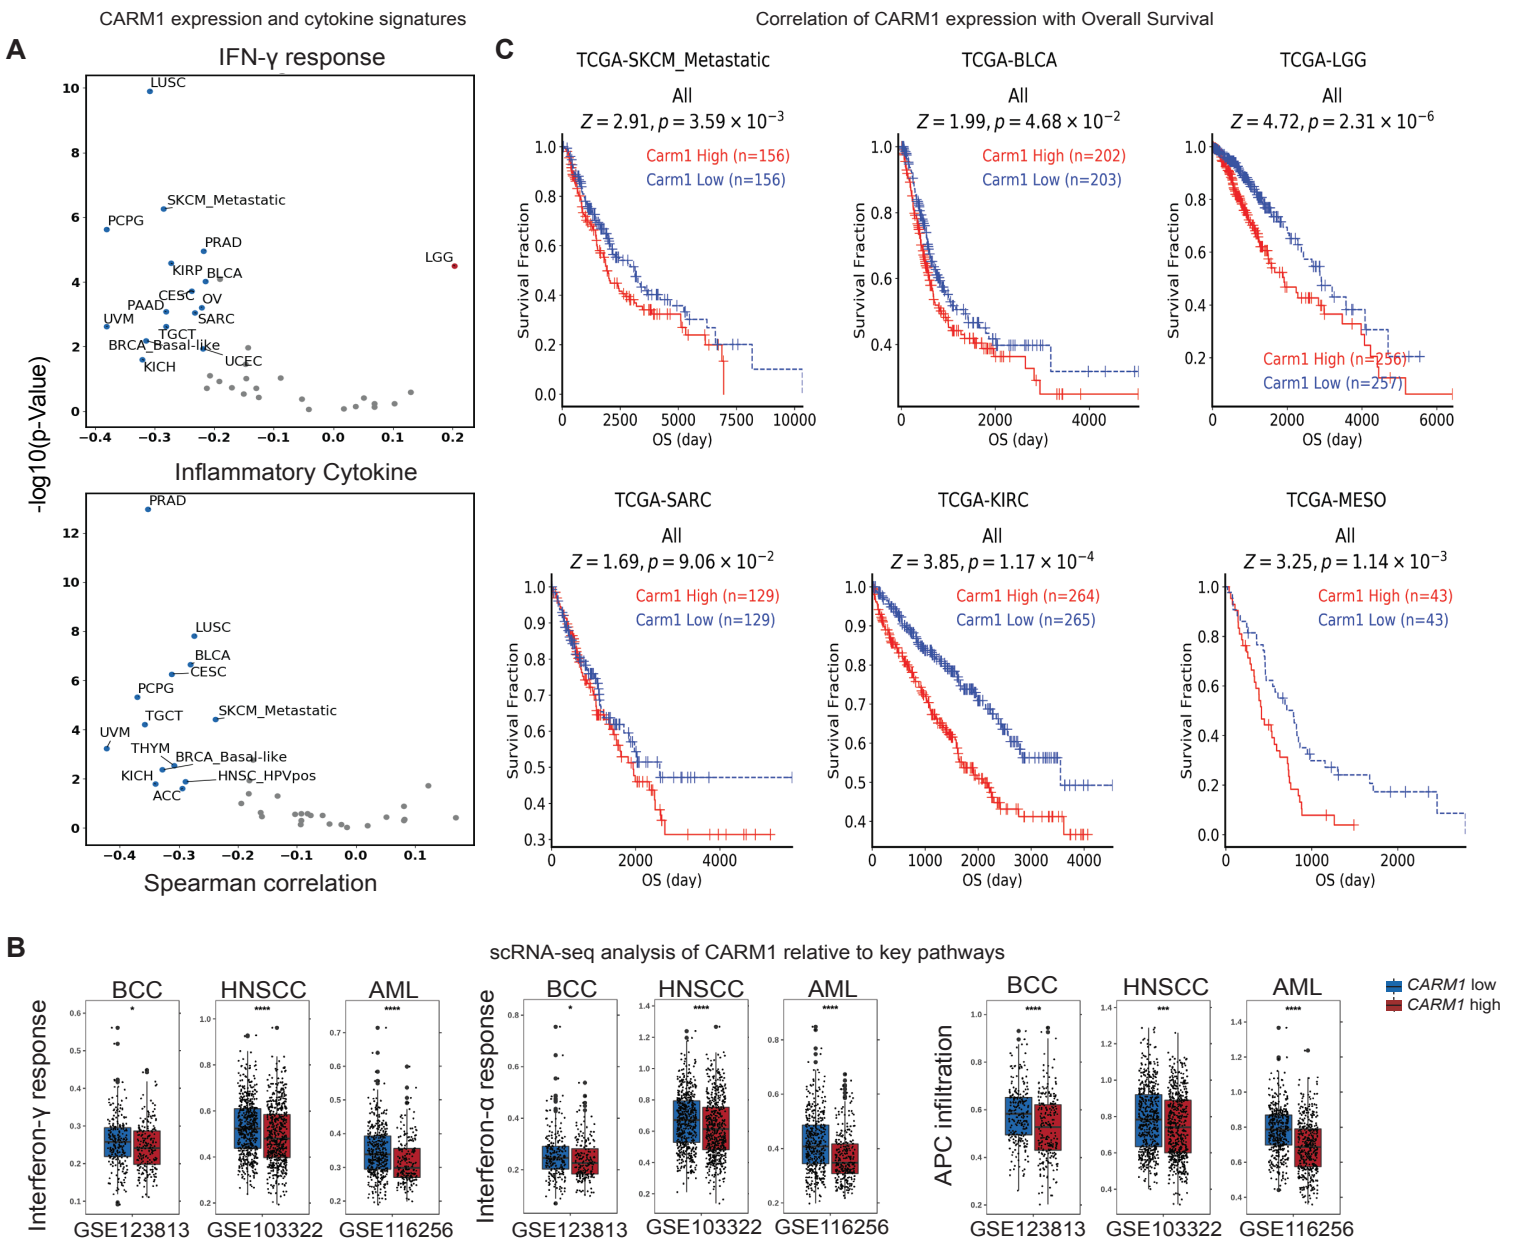

\*



**Figure S14. Expression of *CARM1* in human cancers. Related to Figure 7.**

- A.** Analysis of TCGA RNA-seq data across human cancer types. Correlation of *CARM1* mRNA levels with indicated pathways. Plots show Spearman's correlation and estimated statistical significance for indicated pathways in different cancer types adjusted for tumor purity. Each dot represents a cancer type in TCGA.
- B.** Analysis of scRNA-seq data of malignant cells from three human cancer cohorts (GSE123813: basal cell carcinoma; GSE103322: head and neck cancer; GSE116256: AML). Scores for IFN- $\gamma$  response, IFN- $\alpha$  response and APC (antigen presentation cell infiltration) pathways are shown. Data were stratified by *CARM1* high and low groups using median expression levels. Statistical comparisons were made using two-sided unpaired Mann-Whitney tests.
- C.** Association of *CARM1* mRNA levels with survival in metastatic melanoma (SKCM), bladder urothelial carcinoma (BLCA), Low Grade Glioma (LGG), sarcoma (SARC), Kidney Renal Clear Cell Carcinoma (KIRC), Mesothelioma (MESO). A total of 12 TCGA datasets were analyzed. Statistical analysis was performed using TIMER2.0; shown are all cancer types in which *CARM1* mRNA levels correlated with survival.

Figure S15

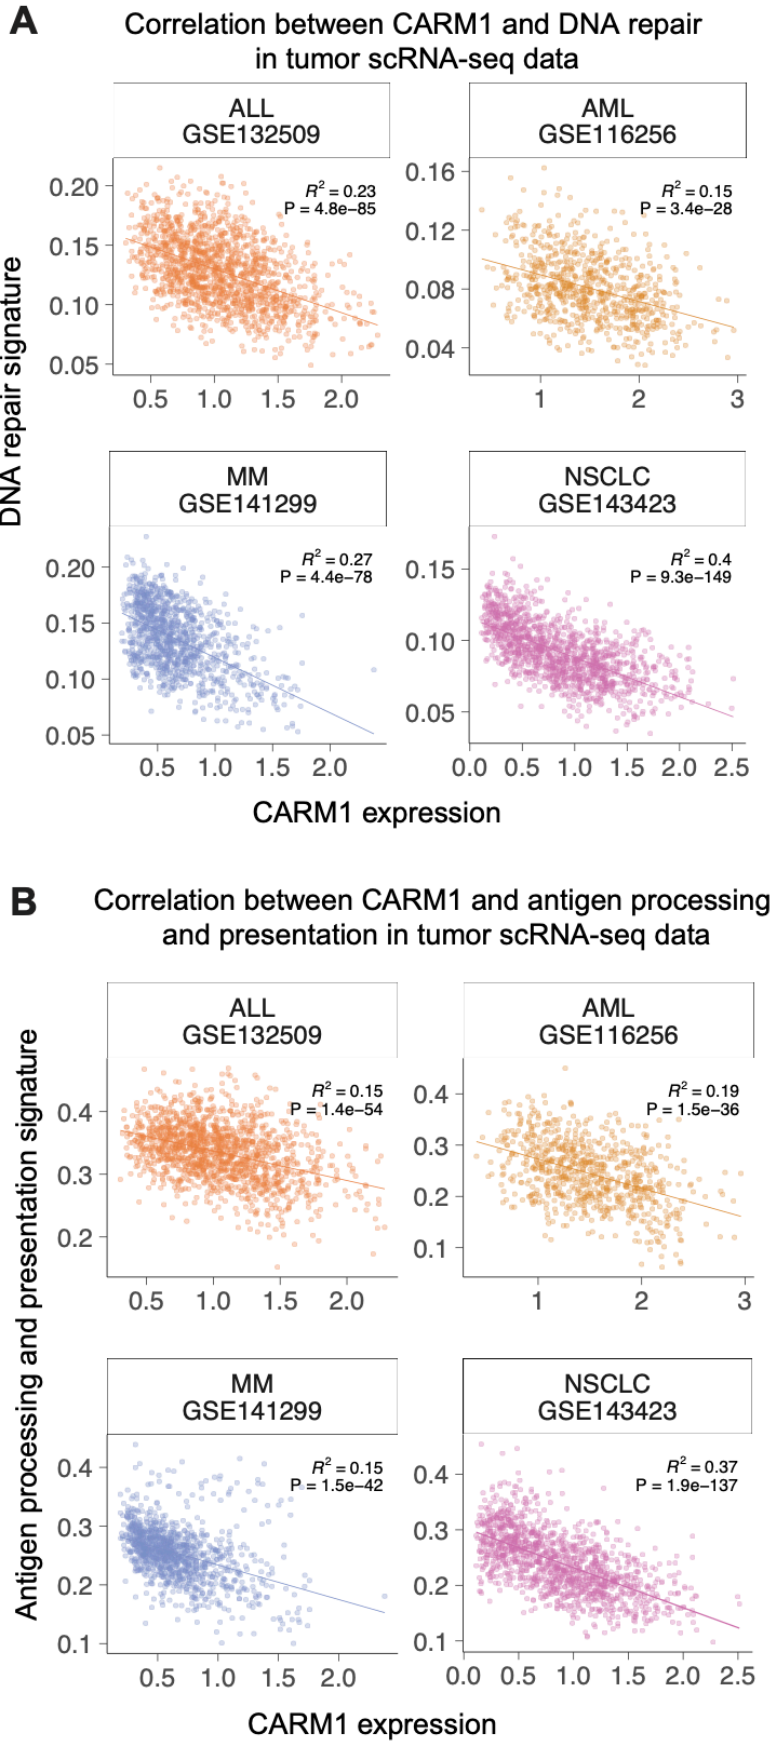

**Figure S15. Single cell analysis of human tumor cells for correlation between *CARM1* mRNA expression and DNA repair as well as antigen presentation pathways. Related to Figure 7.**

**A-B.** Single-cell RNA-seq data of malignant cells were investigated for correlation between *CARM1* mRNA expression and DNA repair pathway hallmark genes (msigdb/hallmark: DNA Repair) **(A)** as well as antigen processing and presentation pathway (KEGG: [https://www.genome.jp/kegg-bin/show\\_pathway?hsa04612](https://www.genome.jp/kegg-bin/show_pathway?hsa04612)) **(B)**. Data are shown for the following human scRNA-seq datasets: ALL (Acute Lymphoblastic Leukemia), AML (Acute Myeloid Leukemia), MM (Multiple Myeloma) and NSCLC (Non-Small Cell Lung Cancer).

Figure S16

**A**

Non-responder  
Responder

CARM1 KO signature applied to clinical trial datasets

Mariathasan2018\_PDL1\_Bladder\_mUC

Riaz2017\_PD1\_Melanoma\_Ipi.Prog

Kim2018\_PD1\_Gastric

Liu2019\_PD1\_Melanoma\_Ipi.Prog

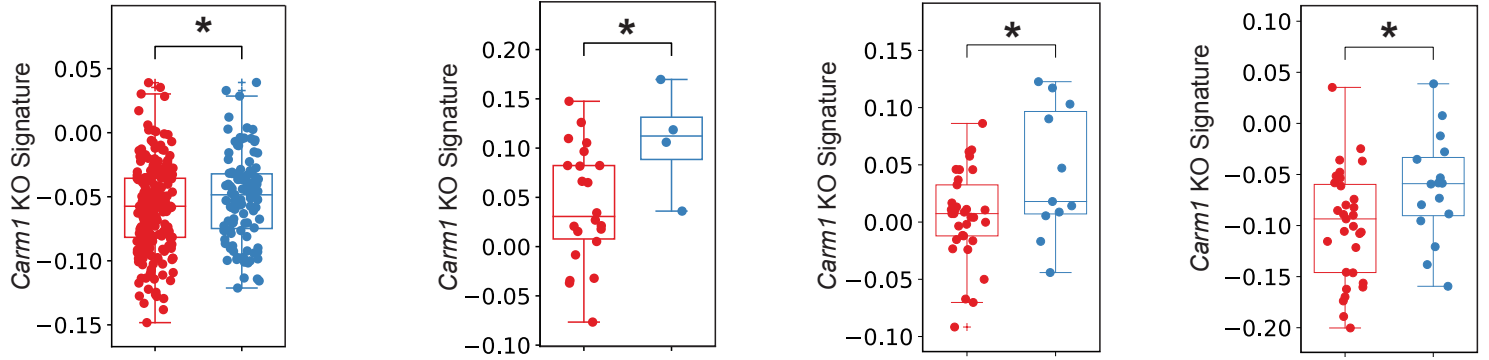

**B**

CARM1 KO signature applied to TCGA datasets

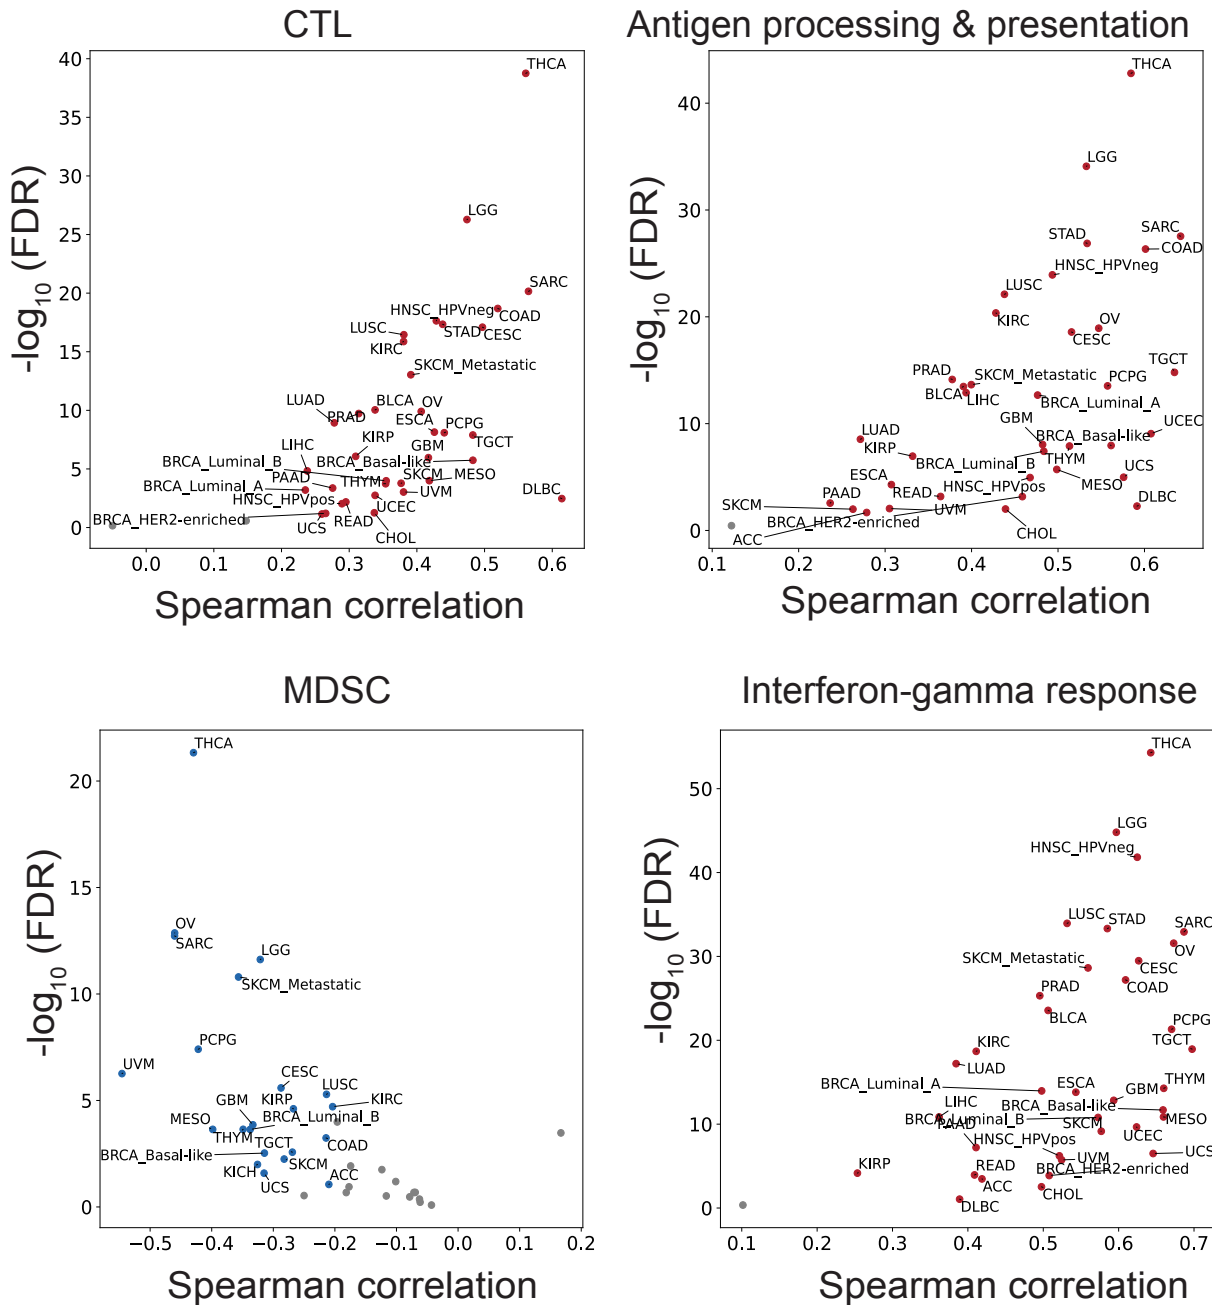

**Figure S16. Analysis of *CARM1* KO gene expression signature for ICB response in clinical trials and immune-related pathways. Related to Figure 7.**

- A.** *CARM1* KO gene signature levels in indicated ICB (immune checkpoint blockade) cohorts of responder and non-responder patients enrolled in clinical trials evaluating PD-1 or PD-L1 blocking mAbs. In each subgroup, predictive power of ICB response was evaluated by comparing *CARM1* KO gene signature high and low groups. The p-values were inferred by Mann-Whitney U test. \*p-value<0.1; NS (non-significant). Ipi (Ipilimumab).
- B.** Analysis of *CARM1* KO signature in TCGA RNA-seq datasets across human cancer types. Correlation of *CARM1* KO signature with indicated immune-related pathways. Plots show Spearman's correlation and estimated statistical significance for indicated pathways in different cancer types adjusted for tumor purity. Each dot represents a cancer type in TCGA.

### Supplemental references of ICB clinical data:

1. Gide TN, Quek C, Menzies AM, Tasker AT, Shang P, Holst J, *et al.* Distinct immune cell populations define response to anti-PD-1 monotherapy and anti-PD-1/anti-CTLA-4 combined therapy. *Cancer cell* **2019**;35(2):238-55. e6.
2. Kim ST, Cristescu R, Bass AJ, Kim K-M, Odegaard JI, Kim K, *et al.* Comprehensive molecular characterization of clinical responses to PD-1 inhibition in metastatic gastric cancer. *Nature medicine* **2018**;24(9):1449-58.
3. Liu D, Schilling B, Liu D, Sucker A, Livingstone E, Jerby-Amon L, *et al.* Integrative molecular and clinical modeling of clinical outcomes to PD1 blockade in patients with metastatic melanoma. *Nature medicine* **2019**;25(12):1916-27.
4. Mariathasan S, Turley SJ, Nickles D, Castiglioni A, Yuen K, Wang Y, *et al.* TGF $\beta$  attenuates tumour response to PD-L1 blockade by contributing to exclusion of T cells. *Nature* **2018**;554(7693):544-8.
5. McDermott DF, Huseni MA, Atkins MB, Motzer RJ, Rini BI, Escudier B, *et al.* Clinical activity and molecular correlates of response to atezolizumab alone or in combination with bevacizumab versus sunitinib in renal cell carcinoma. *Nature medicine* **2018**;24(6):749-57.
6. Riaz N, Havel JJ, Makarov V, Desrichard A, Urba WJ, Sims JS, *et al.* Tumor and microenvironment evolution during immunotherapy with nivolumab. *Cell* **2017**;171(4):934-49. e16.
7. Zhao J, Chen AX, Gartrell RD, Silverman AM, Aparicio L, Chu T, *et al.* Immune and genomic correlates of response to anti-PD-1 immunotherapy in glioblastoma. *Nature medicine* **2019**;25(3):462-9.
